1 *Running head:* Predator activity and landscapes of fear

2

3 *Title:* Diel predator activity drives a dynamic landscape of fear

4

5 *Authors:*

6 Michel T. Kohl<sup>1</sup>, Dept. of Wildland Resources, Utah State University, Logan, UT 84322, USA.

7 Daniel R. Stahler<sup>2</sup>, Yellowstone Center for Resources, National Park Service, Yellowstone

8 National Park, WY 82190, USA.

9 Matthew C. Metz<sup>3</sup>, Wildlife Biology Program, University of Montana, Missoula, MT 59812, and

10 Yellowstone Center for Resources, National Park Service, Yellowstone National Park, WY

11 82190, USA.

12 James D. Forester<sup>4</sup>, Dept. of Fisheries, Wildlife, and Conservation Biology, University of

13 Minnesota, St. Paul, MN, USA.

14 Matthew J. Kauffman<sup>5</sup>, U.S. Geological Survey, Wyoming Cooperative Fish and Wildlife

15 Research Unit, Dept. of Zoology and Physiology, University of Wyoming, Laramie, WY 82071,

16 USA.

17 Nathan Varley<sup>6</sup>, Dept. of Biological Sciences, University of Alberta, Edmonton, Alta., Canada

18 T6G 2E9.

---

<sup>1</sup> [michel.kohl@usu.edu](mailto:michel.kohl@usu.edu)

<sup>2</sup> [Dan\\_Stahler@nps.gov](mailto:Dan_Stahler@nps.gov)

<sup>3</sup> [matt\\_metz@contractor.nps.gov](mailto:matt_metz@contractor.nps.gov)

<sup>4</sup> [jdforest@umn.edu](mailto:jdforest@umn.edu)

<sup>5</sup> [mkauffm1@uwyo.edu](mailto:mkauffm1@uwyo.edu)

<sup>6</sup> [nathan@wolftracker.com](mailto:nathan@wolftracker.com)

19 P.J. White<sup>7</sup>, Yellowstone Center for Resources, National Park Service, Yellowstone National  
20 Park, WY 82190, USA.

21 Douglas W. Smith<sup>8</sup>, Yellowstone Center for Resources, National Park Service, Yellowstone  
22 National Park, WY 82190, USA.

23 Daniel R. MacNulty<sup>9</sup>, Dept. of Wildland Resources, Utah State University, Logan, UT 84322,  
24 USA.

25

26 ABSTRACT

27 A ‘landscape of fear’ (LOF) is a map that describes continuous spatial variation in an animal’s  
28 perception of predation risk. The relief on this map reflects, for example, places that an animal  
29 avoids to minimize risk. Although the LOF concept is a potential unifying theme in ecology that  
30 is often invoked to explain the ecological and conservation significance of fear, quantified  
31 examples of a LOF over large spatial scales are lacking as is knowledge about the daily  
32 dynamics of a LOF. Despite theory and data to the contrary, investigators often assume,  
33 implicitly or explicitly, that a LOF is a static consequence of a predator’s mere presence. We  
34 tested the prediction that a LOF in a large-scale, free-living system is a highly-dynamic map with  
35 ‘peaks’ and ‘valleys’ that alternate across the diel (24-hour) cycle in response to daily lulls in  
36 predator activity. We did so with extensive data from the case study of Yellowstone elk (*Cervus*  
37 *elaphus*) and wolves (*Canis lupus*) that was the original basis for the LOF concept. We  
38 quantified the elk LOF, defined here as spatial allocation of time away from risky places and  
39 times, across nearly 1000-km<sup>2</sup> of northern Yellowstone National Park and found that it fluctuated

---

<sup>7</sup> [pj\\_white@nps.gov](mailto:pj_white@nps.gov)

<sup>8</sup> [Doug\\_Smith@nps.gov](mailto:Doug_Smith@nps.gov)

<sup>9</sup> [dan.macnulty@usu.edu](mailto:dan.macnulty@usu.edu)

40 with the crepuscular activity pattern of wolves, enabling elk to use risky places during wolf  
41 downtimes. This may help explain evidence that wolf predation risk has no effect on elk stress  
42 levels, body condition, pregnancy, or herbivory. The ability of free-living animals to adaptively  
43 allocate habitat use across periods of high and low predator activity within the diel cycle is an  
44 underappreciated aspect of animal behavior that helps explain why strong antipredator responses  
45 may trigger weak ecological effects, and why a LOF may have less conceptual and practical  
46 importance than direct killing.

47

48 *Keywords:* antipredator behavior, diel activity, elk, habitat selection, landscape of fear (LOF),  
49 predation risk, predator activity rhythm, predator-prey interaction, wolf, Yellowstone

50

51

## INTRODUCTION

52 Fear of predation (perceived predation risk) caused by the mere presence of a predator is  
53 increasingly regarded as an ecological force that rivals or exceeds that of direct killing (Preisser  
54 et al. 2005). The ‘landscape of fear’ (LOF) concept has been advanced as a general mechanism  
55 that drives the effects of fear that cascade from individuals to ecosystems (Brown and Kotler  
56 2004, Schmitz 2005, Laundré et al. 2010), including changes in prey physiology (Zanette et al.  
57 2014) and demography (Preisser et al. 2007), plant growth (Ford et al. 2014), and nutrient  
58 cycling (Hawlena et al. 2012). Operationally, a LOF is a map that describes the continuous  
59 change in predation risk that an animal perceives as it navigates the physical landscape (Brown  
60 and Kotler 2004, Laundré et al. 2001, 2010). This mental map of risk overlies the physical terrain  
61 like a map of soils, vegetation, or climate, and its ‘peaks’ and ‘valleys’ describe an animal’s  
62 perception of those locations as dangerous and safe, respectively (van der Merwe and Brown

63 2008). Risk perception is indexed by an animal's measurable response to changes in predation  
64 risk (Lima and Steury 2005), and the continuous spatial patterning of this response approximates  
65 a LOF as originally defined by Laundré et al. (2001, 2010). Brown and Kotler (2004) defined the  
66 concept more narrowly as the spatial distribution of the foraging cost of predation, which is fear  
67 measured as the energetic consequence of an animal's response, chiefly vigilance and (or) time  
68 allocation. No matter its definition, the LOF concept is often cited to explain the ecological  
69 effects of fear despite two important empirical shortcomings.

70 First, quantified examples of large-scale LOFs are lacking. Numerous studies have  
71 measured animal response to spatial variation in predation risk (reviewed by Moll et al. 2017),  
72 but few have mapped this response across physical landscapes as a continuous function of risk in  
73 accord with the LOF concept. Among those that have, none mapped areas much larger than 1-  
74 km<sup>2</sup> (Shrader et al. 2008, van der Merwe and Brown 2008, Druce et al. 2009, Willems and Hill  
75 2009, Abu Baker and Brown 2010, Emerson et al. 2011, Matassa and Trussell 2011, Iribarren  
76 and Kotler 2012, Coleman and Hill 2014). Conversely, some studies have mapped large-scale  
77 vegetation patterns and attributed them to animal response to risk without measuring the  
78 response itself (Madin et al. 2011). The response has also been overlooked in studies that define  
79 a LOF solely in terms of spatial variation in predation risk (e.g., Kauffman et al. 2010, Catano et  
80 al. 2016). Large-scale, quantitative examples of a LOF are probably lacking because spatially-  
81 explicit data on animal response to risk across vast physical landscapes are difficult to obtain.

82 Second, little is known about LOF dynamics across the diel (24-hr) cycle. To date, many  
83 ecologists have, implicitly or explicitly, assumed that a LOF is a fixed spatial pattern as long as  
84 the predator is present (but see Palmer et al. 2017). The underlying rationale is that a constant  
85 possibility of predation enforces a chronic state of apprehension in the prey (Schmitz et al. 1997,

86 Brown et al. 1999). This ‘fixed-risk’ assumption of constant attack over time has been a  
87 conceptual mainstay in the study of behavioral predator-prey interactions for decades (Lima  
88 2002). Nevertheless, it neglects how predator activity and hunting ability can vary across the diel  
89 cycle, and how this may foster a fluctuating acute state of apprehension in the prey and a  
90 dynamic LOF despite the constant presence of predators.

91 Many predators are only active at certain times of day, and visual predators active at  
92 night often cannot hunt in absolute darkness. These predatory constraints provide pulses of safety  
93 during the diel cycle that may temporarily relieve an animal’s fear of predation and flatten its  
94 LOF. This hypothesis is broadly consistent with risk allocation theory, which predicts that  
95 animals constantly exposed to predators should respond to pulses of safety with intense feeding  
96 efforts (Lima and Bednekoff 1999). It also accords with numerous empirical studies that show  
97 how various animals (e.g., zooplankton, rodents, and ungulates) forage in risky places during  
98 periods of the diel cycle (e.g., day or night) associated with reduced predator activity and/or  
99 hunting ability (reviewed by Lima and Dill 1990, Lima 1998, Brown and Kotler 2004, Caro  
100 2005; see also Fischhoff et al. 2007, Tambling et al. 2012, Burkepile et al. 2013). However, these  
101 studies neither tested how animal response to spatial risk is linked to measured variation in diel  
102 predator behavior, nor showed how this linkage shapes the animal’s LOF across the diel cycle.  
103 Dichotomizing continuous variation in diel predator behavior into periods of presumed safety  
104 and danger (e.g., day versus night) is potentially misleading if diel behavior does not conform to  
105 these simple categories or if animals assess predation risk as a continuous variable (Creel 2011).

106 The empirical gaps in the LOF concept are exemplified by its founding case study of elk  
107 (*Cervus elaphus*) in northern Yellowstone National Park (YNP) following wolf (*Canis lupus*)  
108 reintroduction there in 1995-97 (Laundré et al. 2001). Although this case is frequently cited as a

109 well-understood example of a LOF, and is one that has motivated the proposal that the LOF is a  
110 unifying concept in ecology (Laundré et al. 2010), researchers never quantified the elk LOF after  
111 wolf reintroduction, nor examined its temporal dynamics in relation to diel wolf behavior.  
112 Instead, the elk LOF was inferred from broad-scale, population-level data on vigilance behavior  
113 (Laundré et al. 2001), fecal pellets (Hernández and Laundré 2005), and herbivory (Ripple and  
114 Beschta 2004) that supported three predictions based on the LOF concept: (1) elk shifted habitat  
115 use in response to wolves, including abandonment of high-risk open areas, which (2) decreased  
116 diet quality and body fat, and (3) reduced browsing on woody deciduous plants in high risk areas  
117 (Laundré et al. 2001, 2010). Some researchers have argued that habitat shifts also reduced elk  
118 pregnancy rate (Creel et al. 2009, Christianson and Creel 2014). On the other hand, concurrent  
119 fine-scale, individual-level data on movement, body condition, and pregnancy rate indicated elk  
120 selected for open areas (Fortin et al. 2005, Mao et al. 2005) and maintained body fat and  
121 pregnancy rate (Cook et al. 2004, White et al. 2011, Proffitt et al. 2014). Whereas Fortin et al.'s  
122 (2005) 6.5-month study (2001-2002) of 13 female elk equipped with global positioning system  
123 (GPS) radio collars suggested elk avoided aspen (*Populus tremuloides*) forests in response to  
124 wolves, a three-year experimental study (2004-2007) of aspen demography found that elk  
125 browsing was not reduced in risky places (Kauffman et al. 2010). These divergent results have  
126 yet to be reconciled, and together they highlight an outstanding need to clarify the elk LOF that  
127 prevailed in YNP during the initial years after wolf reintroduction.

128         The overarching purpose of this study was to improve the empirical foundation of the  
129 LOF concept. Our objectives were to (1) quantify a large-scale LOF, and (2) determine how this  
130 mental map of risk changes across the diel cycle in response to the daily activity pattern of a  
131 predator that is always present. Because the response of Yellowstone elk to wolf reintroduction

132 is a seminal yet unresolved example of a LOF, we examined the elk LOF in northern YNP within  
133 the first decade after wolves were released.

134 We defined the elk LOF as spatial allocation of time away from risky places and times.  
135 This conforms to Laundré et al.'s (2001, 2010) broad definition and approximates Brown and  
136 Kotler's (2004) narrower definition. The latter is possible because research indicates that  
137 Yellowstone elk manage wolf predation risk mainly through time allocation, keeping vigilance  
138 levels constant across habitats that vary in predation risk (e.g., near versus far from forest cover)  
139 and increasing vigilance only when wolves are an immediate threat (Childress and Lung 2003;  
140 Lung and Childress 2007; Winnie and Creel 2007; Creel et al. 2008; Liley and Creel 2008;  
141 Gower et al. 2009; Middleton et al. 2013).

142 To assess spatial time allocation, we conducted a retrospective habitat selection analysis  
143 of data from 27 GPS radio-collared female elk collected during 2001-2004. This included 13 elk  
144 from Fortin et al.'s (2005) study, 2 elk from Boyce et al. (2003), 1 elk from Forester et al. (2007,  
145 2009), and 11 elk whose data were never published. Together, these were the first elk GPS  
146 location data collected in YNP before or after wolf reintroduction, and we used them to quantify  
147 the elk LOF across 995-km<sup>2</sup> of northern YNP. We tested how this large-scale LOF varied across  
148 the diel cycle in relation to the daily activity pattern of wolves which we estimated from direct  
149 observations of hunting behavior (1995-2003) and GPS location data (2004-2013). We predicted  
150 a dynamic LOF with peaks and valleys that alternated across the diel cycle in response to daily  
151 lulls in wolf activity.

152

153 METHODS

154 *Study Area*

155 Our study occurred in a 995-km<sup>2</sup> area of northern YNP (44° 56' N, 110° 24' W) where the  
156 climate is characterized by short, cool summers and long, cold winters (Houston 1982). Low  
157 elevations (1500-2000 m) in the area create the warmest and driest conditions in YNP, providing  
158 important winter range for ungulates, including elk. Vegetation includes montane forest (44%;  
159 e.g., lodgepole pine [*Pinus contorta*] and Douglas fir [*Pseudotsuga menziesii*]), open sagebrush–  
160 grassland (37%; e.g., Idaho fescue [*Festuca idahoensis*], blue-bunch wheatgrass  
161 [*Pseudoroegneria spicata*], and big sagebrush [*Artemisia tridentata*]), upland grasslands, wet  
162 meadows, and non-vegetated areas (19%) (Despain 1990).

163

164

#### *Study Population*

165 We analyzed habitat selection behavior of 27 adult (> 1 year-old) female elk that spent  
166 winter in northern YNP and adjoining areas of the Yellowstone River valley outside YNP from  
167 about 15 October to 31 May, 2001-2004. These elk were from a migratory population that  
168 numbered from 8,300-13,400 individuals. Our sample of adult female elk was captured in  
169 February (2001-2003) via helicopter net-gunning (Hawkins and Powers, Greybull, Wyoming,  
170 USA; Leading Edge Aviation, Lewiston, Idaho, USA) and fitted with Telonics (Telonics, Mesa,  
171 Arizona, USA) or Advanced Telemetry Systems Inc. (Isanti, Minnesota, USA) GPS radio-collars  
172 ( $\bar{x} \pm SD$  location error = 6.15 ± 5.24 m; Forester et al. 2007) programmed to collect locations at  
173 4-6 hour intervals (5 hour intervals:  $n = 23$ ; alternating between 4 and 6 hour intervals:  $n = 4$ ). To  
174 control for movements associated with migratory behavior, we limited our analysis to winter  
175 locations collected from 1 November – 30 April. If individuals arrived on the winter range after  
176 1 November, data were censored to the individual's arrival date (1-22 November). Location data  
177 for each individual were collected for 30-353 days ( $\bar{x} \pm SD = 124.5 \pm 12.5$ ) across 1-3 winters



178 until collar failure, collar removal, or animal death. We censored location data to include only  
179 high-quality locations following guidelines developed by Forester et al. (2009).

180 Elk age was estimated using cementum analysis of an extracted vestigial tooth (Hamlin et  
181 al. 2000) and pregnancy was determined from a serum sample using the pregnancy-specific  
182 protein B assay (Sasser et al. 1986, Noyes et al. 1997, White et al. 2011). We evaluated elk  
183 nutritional condition via a rump body condition score developed for elk and maximum  
184 subcutaneous rump fat thickness measured using an ultrasonograph (Cook et al. 2004). We  
185 estimated ingesta-free body fat percentage using the scaled LIVINDEX for elk, which is an  
186 arithmetic combination of the rump body condition score and maximum rump fat thickness  
187 allometrically scaled using body mass (Cook et al. 2004).

188 Wolves in this study were members or descendants of a population of 41 radio-collared  
189 wolves reintroduced to YNP in 1995-1997 (Bangs and Fritts 1996). The study occurred during a  
190 time of peak wolf abundance in YNP: wolf numbers in northern YNP ranged from 70-98  
191 individuals in 4-8 packs (Cubaynes et al. 2014). Each winter, 20-30 wolves, including 30-50% of  
192 pups born the previous year, were captured and radio-collared (Smith et al. 2004). Wolves were  
193 fitted with very high frequency (VHF; Telonics Inc., Mesa, AZ, USA) or GPS (Televilt,  
194 Lindesberg, Sweden; Lotek, Newmarket, ON, Canada) radio-collars. Locations of VHF and  
195 GPS-collared wolves were recorded approximately daily during two 30-day periods in early  
196 (mid-November to mid-December) and late (March) winter, when wolf packs were intensively  
197 monitored from the ground and fixed-wing aircraft, and approximately weekly during the rest of  
198 the year. GPS collars recorded locations every hour during the 30-day periods and at variable  
199 intervals outside these periods. The proportion of the Yellowstone wolf population that was  
200 radio-collared ranged from 35-40%. We captured and handled wolves and elk following

201 protocols in accord with applicable guidelines from the American Society of Mammalogists  
202 (Sikes 2016) and approved by the National Park Service Institutional Animal Care and Use  
203 Committee.

204

### 205 *Diel activity patterns*

206 We used movement rate to index diel wolf activity given that speed of locomotion is a  
207 valid proxy for diel activity patterns in large mammals (Ensing et al. 2014). We estimated  
208 movement rate at each hour of the day from the hourly winter positions of 21 GPS-collared  
209 wolves recorded in northern YNP during 2004-2013. Wolf GPS data were unavailable prior to  
210 2004. Movement rate equaled the average Euclidean distance of the preceding 1-hour or 5-hour  
211 time step. We used hourly movement rate (km/hr) to describe the diel pattern in wolf activity and  
212 5-hour movement rate (km/5-hrs) to test how diel wolf activity influenced elk selection of safe  
213 and risky places. We used 5-hour movement rate in the habitat selection analysis to match the 5-  
214 hour time interval between consecutive elk locations. To generalize the 1-hour data to 5-hour  
215 data, we retained every fifth location beginning with the first 5-hour location available. We used  
216 only consecutive 1-hour and 5-hour locations to calculate movement rates.

217 We estimated the population-level pattern in diel movement rate by applying a  
218 generalized additive mixed model (GAMM) to both the 1-hour and 5-hour locations using the  
219 mgcv package (version 1.8.0) in R 3.2.3. Because movement data were heavily right skewed  
220 (e.g., Fortin et al. 2005), we fit the GAMM using the negative binomial family and incorporated  
221 performance iterations such that the scale parameter was as close to 1 as possible. We applied a  
222 cyclic cubic regression spline so that the first and last hour of the day matched in accordance  
223 with the diel cycle. We included a random intercept for individual identity to account for

224 repeated measures within the study period. We were unable to distinguish between individual  
225 and annual variation in wolf diel activity patterns because the number of individuals sampled  
226 within years was too small (Appendix S1). Thus, our estimate of diel activity is a population-  
227 level estimate calculated as a univariate function of time of day. We used the estimated 5-hour  
228 movement rate as the covariate for diel wolf activity in the habitat selection analysis. We used  
229 this same approach to model the diel activity pattern of GPS-collared elk, which we did for  
230 illustrative purposes. All of our major inferences were based on analyses of elk habitat selection.  
231 Each wolf provided an independent measure of movement rate because it was solitary, was the  
232 only GPS radio-collared wolf in a pack, or rarely associated with other GPS-collared pack  
233 members. The latter was limited to 3 pairs of GPS-collared wolves that were nominally in the  
234 same pack during a 30-day period. The proportion of simultaneous fixes that wolves in each pair  
235 were near each other (< 2 km) was low: 3%, 6%, and 22%.

236 We checked that our estimate of diel wolf activity was a valid index of diel hunting  
237 pressure during the study period by comparing mean 1-hour diel movement rate to the hourly  
238 distribution of daylight (0700-2000) observations of wolves encountering elk in winter from  
239 1995-2003. An encounter was defined as wolves approaching, harassing, chasing, and (or)  
240 grabbing elk. Details about how we observed and recorded wolf-elk encounters are described  
241 elsewhere (MacNulty et al. 2007).

242 A concurrent cause-specific mortality study established that wolves were the primary  
243 predator of our sample of adult female elk; only one case of cougar-caused mortality was  
244 documented (Evans et al. 2006). Analyses of wolf-killed prey during our study period also  
245 revealed that elk comprised 90-96% of prey species killed by wolves during winter (Smith et al.

246 2004; Metz et al. 2012). Together, these studies indicate that the opportunity to kill elk was a key  
247 driver of wolf activity in our study area during the period of interest (2001-2004).

248

### 249 *Spatial variation in wolf predation risk*

250 We considered multiple indices of spatial variation in wolf predation risk because it is  
251 unclear how elk perceive spatial risk (Beschta and Ripple 2013, Kauffman et al. 2013, Moll et al.  
252 2017). We calculated four indices of spatial risk: predicted occurrence of wolf-killed elk  
253 (Kauffman et al. 2007, 2010), density of wolf-killed elk (Gude et al. 2006), openness (Creel et al.  
254 2005, Fortin et al. 2005, Mao et al. 2005), and wolf density (Fortin et al. 2005, Mao et al. 2005,  
255 Forester et al. 2007). Kill sites are a well-established metric of predation risk in wildlife systems  
256 (e.g., Hopcraft et al. 2005; Thaker et al. 2011; Gervasi et al. 2013; Lone et al. 2014). All spatial  
257 risk indices (30 x 30 m grid cell) were developed using the Geospatial Modelling Environment  
258 or ArcGIS 10.1.

259

### 260 Predicted kill occurrence

261 We used a previously published model to predict the spatial distribution of wolf-killed  
262 elk in northern YNP during each winter of our study (Fig. 1a). Kauffman et al. (2007) developed  
263 this model to understand elk response to wolf predation risk in northern YNP. It estimates the  
264 relative probability of a kill on the landscape compared to random locations based on the  
265 landscape attributes of 774 locations of wolf-killed elk. These kills included all age and sex  
266 classes and were documented in winter during a period (1996-2005) that encompassed the  
267 present study. Landscape attributes included annual distribution of wolf packs (based on  
268 cumulative kernel densities weighted by pack size), relative elk density (from an elk habitat

269 model; Mao et al. 2005), proximity to streams, proximity to roads, habitat openness (forest vs.  
270 grassland), slope, and snow depth. The model predicts kill occurrence with respect to the average  
271 value of each landscape attribute, such that a predicted kill occurrence of 1 equals no difference  
272 between the location of interest and the average landscape, whereas a predicted kill occurrence  
273 of 10 equals a kill probability 10 times greater than average for a given year. This produces a  
274 year-specific range of values that did not exceed 245 for any year. For example, the range in  
275 winter 2000-01 was 0 – 36.5 whereas the range in winter 2001-2002 was 0 – 245.

276

### 277 Kill density

278 We used a kernel density estimator (KDE) to estimate the spatial distribution of wolf-  
279 killed adult female and calf elk in northern YNP during each winter of our study (Fig. 1b). We  
280 excluded kills of adult males because their spatial distribution differed from that of adult females  
281 and calves (Pearson’s correlation coefficient,  $r = 0.39$ ; Appendix S2), and we sought to control  
282 for possible behavioral responses of adult female elk to sex-specific kill distributions. A total of  
283 235 wolf-killed adult female and calf elk were recorded across the 4 winters (Nov. 2000 – Apr.  
284 2004) following established protocols (Smith et al. 2004). The number of kills included in each  
285 annual kill density KDE ranged from 44-84. Following previous studies, we used a fixed  
286 bandwidth of 3 km (Fortin et al. 2005). Annual kill density KDEs were standardized from 0 – 1.

287

### 288 Openness

289 We calculated openness (Fig. 1c) as the sum of non-forested cells within a 500 x 500 m  
290 moving window centered on each grid cell (range 0 [deep forest] – 289 [open grassland])  
291 following Boyce et al. (2003). We obtained information on the spatial distribution of vegetation

292 types in northern YNP from databases provided by the YNP Spatial Analysis Center. Non-  
293 forested pixels were identified from a 1991 vegetation layer which accounted for vegetative  
294 changes following the 1988 fires in and near YNP (Mattson et al. 1998). We used this layer to  
295 calculate openness because it permitted direct comparison with contemporaneous northern  
296 Yellowstone elk habitat selection studies that also utilized the 1991 vegetation layer (e.g., Boyce  
297 et al. 2003, Fortin et al. 2005, Mao et al. 2005). We verified that our map of openness was  
298 representative of conditions during the study period by comparing it to one calculated from a  
299 2001 LANDFIRE vegetation layer (landfire.gov). We developed and analyzed a single map of  
300 openness because there was no inter-annual variation in openness during the study.

301

### 302 Wolf density

303 We estimated wolf density (Fig. 1d) from winter aerial wolf telemetry locations that were  
304 randomly filtered to obtain a single location per pack per day. We calculated a least-squares  
305 cross-validation fixed smoothing factor ( $H$ ) for each pack with at least 25 locations per winter  
306 using Animal Space Use 1.3. Using all non-redundant locations, we used mean  $H$  (1 km) to  
307 calculate annual winter bi-weight kernel densities weighted by pack size (Forester et al. 2007).  
308 Annual wolf density KDEs were standardized from 0 – 1.

309

### 310 *Elk habitat selection*

311 We analyzed elk habitat selection using matched case-control logistic regression (CCLR).  
312 We used a 1:3 empirical sampling design (Fortin et al. 2005) where, for each end location of a  
313 movement step, 3 available locations were sampled with replacement from each individual's  
314 respective step-length and turning-angle distributions. Each set of 4 locations defines a unique

315 stratum ( $k$ ). Successive strata ( $k = 10,199$ ) were not independent. Although this autocorrelation  
316 does not affect estimated coefficients it does bias the associated standard errors (Fortin et al.  
317 2005). We calculated robust standard errors by specifying an intragroup correlation in our model.  
318 Groups were clusters of strata ( $n = 1,080$  clusters) assigned sequentially to each individual each  
319 winter and defined by a step-lag at which the autocorrelation was nearly zero. Autocorrelation  
320 analysis indicated that this step-lag was 15 steps, such that steps separated by 75 hours were  
321 independent (Basille et al. 2015).

322 We fitted the following CCLR model to all clusters using generalized estimating  
323 equations (Craiu et al. 2008):

324

$$325 \quad \quad \quad (w) = \exp (X'\beta) \quad \quad \quad (1)$$

326

327 where  $\beta$  is a vector of fitted coefficients and  $X$  is matrix of explanatory variables for all used and  
328 available locations that describe the relative probability of a movement step ( $w$ ), which is the  
329 straight-line segment between successive locations at 5-hour intervals. Movement steps with a  
330 higher score relative to the set of possible steps have higher odds of being chosen by an animal  
331 (Fortin et al. 2005). The sign of the relationship between  $w$  and spatial risk indicates steps toward  
332 or away from risky places: a positive relationship indicates steps toward risky places whereas a  
333 negative relationship indicates steps away from risky places. Values of  $w$  that depict these  
334 relationships reflect different levels of perceived predation risk that correspond to the ‘peaks’  
335 and ‘valleys’ in a LOF: minimum values identify peaks (high perceived predation risk) and  
336 maximum values identify valleys (low perceived predation risk). We rescaled predicted values of  
337  $w$  to present an intuitive visualization of the elk LOF (see below).

338           We could not estimate the main effect of mean 5-hour wolf movement rate because it did  
339 not vary within a stratum owing to how used and available locations within a stratum share the  
340 same point in time. Within the case-control design of our model, spatial risk variables assigned  
341 to each of the three control locations came from the same year in which the use location  
342 occurred. Because results did not differ between models fitted to all clusters and models fitted to  
343 every other independent cluster ( $n = 2$  independent datasets), we present results from the analysis  
344 of all the clusters.

345           For each spatial risk index, we developed a ‘space-only’ habitat selection model and  
346 compared it to a ‘space  $\times$  activity’ model that included terms for the interaction between spatial  
347 risk and mean 5-hr wolf movement rate. The space  $\times$  activity model evaluated how elk selection  
348 for risky places at the end of a 5-hour movement step was affected by the mean wolf movement  
349 rate during that step. Because prey may not respond instantaneously to predator activity due to  
350 imperfect knowledge (Brown et al. 1999), optimal foraging strategies (Kie 1999), shell games  
351 (Mitchell and Lima 2002), large landscapes (Middleton et al. 2013a), or a combination thereof,  
352 we evaluated the potential for a behavioral lag in habitat selection up to the preceding behavioral  
353 step (i.e., 5 hours). We tested different forms of the relationship between habitat selection and  
354 spatial risk in the space-only analysis and compared the best-fit space-only model to the best-fit  
355 forms in the space  $\times$  activity analysis. This was necessary to account for how elk in northern  
356 YNP may tolerate low levels of spatial risk (Fortin et al. 2005, Mao et al. 2005). We tested for a  
357 response threshold by comparing models with a linear effect for spatial risk to models with a  
358 threshold effect specified by two linear splines. We performed a grid search of candidate CCLR  
359 models to determine the presence and position of thresholds. To control for outliers, we imposed  
360 constraints such that the threshold occurred within 1 – 99% of all used data points for a given



361 spatial risk index. This resulted in a range of candidate models ( $n = 41-288$ ) depending on the  
362 precision (i.e., decimal units) and scale (i.e., difference in minimum/maximum values) of the  
363 spatial risk index.

364 We compared models using the quasi-likelihood under independence criteria (QIC; Pan  
365 2001), which considers independent clusters of observations while also accounting for non-  
366 independence between subsequent observations (Craiu et al. 2008). The most parsimonious  
367 model was the one with the lowest QIC and smallest  $\Delta$ QIC, which equals the QIC for the model  
368 of interest minus the smallest QIC for the set of models being considered. The best-fit model has  
369 a  $\Delta$ QIC of zero.

370 We performed 1,000 iterations of a 5-fold cross validation for case-control design to  
371 evaluate the predictive accuracy of each best-fit model (Boyce et al. 2002). Location data were  
372 partitioned into five equal sets and models were fitted to each 80% partition of the data, while the  
373 remaining 20% of the data were withheld for model evaluation. Within a cross-validation, the  
374 estimated probabilities were binned into 10 equal bins and correlated with the observed  
375 proportion of movement steps within the evaluation set. This yielded an average Spearman rank  
376 correlation ( $r_s$ ). Correlations  $> 0.70$  indicate satisfactory fit of models to data (Boyce et al. 2002).  
377 CCLR analyses and  $k$ -folds cross validations were performed in R 3.0.2 using the SURVIVAL  
378 and HAB packages, respectively.

379

### 380 *Visualizing the landscape of fear*

381 We used predicted values from our best-fit space  $\times$  activity step selection model to  
382 visualize the LOF for elk in northern YNP. For simplicity, we focused on a single index of  
383 spatial risk: kill density. We calculated the predicted relative probability of a movement step ( $\hat{w}$ )

384 at each level of kill density at each hour of diel wolf activity. We rescaled these values ( $1 - \hat{w}$ )  
385 and used the results to elevate the 2-dimensional kill density layer in ArcScene 10.2. Rescaling  
386 was necessary so that higher elevations indicated increasing levels of perceived predation risk as  
387 per the LOF concept. We constructed a static visualization at two hours when wolf activity was  
388 highest (1100: 2.80 km/5-hour) and lowest (1600: 1.42 km/5-hours), and an animated  
389 visualization that showed perceived predation risk at each hour of the diel cycle (0000-2300).

390

## 391 RESULTS

392 Most GPS-collared wolves (19 of 21) were crepuscular such that their hourly movement  
393 rates followed: morning > evening > night > day (Fig. 2a). There was less individual-level  
394 variation during peak morning hours than during peak evening hours, indicating that morning  
395 was a more reliably active period. The population-average pattern in hourly movement rate  
396 during 2004-2013 matched the hourly distribution of directly-observed daylight wolf encounters  
397 with elk ( $r = 0.79$ ;  $N = 502$  encounters; Fig. 2a) during 1995-2003. A similar and slightly  
398 stronger association was evident when we limited the encounter data to actual kills ( $r = 0.87$ ,  $N =$   
399 89 kills). This suggests that diel variation in wolf movement rate was a meaningful index of diel  
400 variation in wolf predation risk. It also suggests, together with evidence that the crepuscular  
401 pattern in Fig. 2a was consistent across years (Appendix S3), that the crepuscular pattern during  
402 2004-2013 was representative of the crepuscular pattern during 2001-2004 when elk location  
403 data were recorded.

404 We estimated wolf movement rate as distance travelled per 5 hours to match the time  
405 interval between consecutive elk locations. This shifted the timing of wolf activity to later in the  
406 day but it did not alter the crepuscular pattern (Fig. 2b). The mean diel movement rate (km/5-hrs)

407 of elk was similarly crepuscular except that the timing of high and low movement rates was  
408 opposite that of wolves: elk movement was greatest at dusk and less at dawn (Fig. 2b).  
409 Correlation between wolf and elk movement rates was moderate ( $r = 0.58$ ).

410 Irrespective of diel wolf movement, the influence of spatial risk on elk habitat selection  
411 was inescapably nonlinear. For each spatial risk index, the best-fit space-only model included a  
412 linear spline for spatial risk (Appendix S4), indicating a threshold at which the effect of spatial  
413 risk on habitat selection changed. Evidence against a model describing a simple linear  
414 relationship between spatial risk and habitat selection was strong for predicted kill occurrence  
415 ( $\Delta\text{QIC} = 347.13$ ), kill density ( $\Delta\text{QIC} = 78.72$ ), openness ( $\Delta\text{QIC} = 16.35$ ), and wolf density  
416 ( $\Delta\text{QIC} = 9.98$ ; Appendix S4). The best-fit models indicated that elk preferred increasingly risky  
417 places at low levels of spatial risk ( $P < 0.001$ ; Appendix S5), perhaps due to more food in these  
418 areas. At high levels of spatial risk, the effect of risk on habitat selection was negative (wolf  
419 density;  $P = 0.02$ ), positive (kill density,  $P < 0.01$ ; openness,  $P < 0.001$ ), or nil (predicted kill  
420 occurrence;  $P = 0.76$ ; Appendix S5).

421 Support for the best-fit space-only models was substantially weaker compared to models  
422 that included space  $\times$  activity interactions between mean diel movement rate (km/5-hrs) of  
423 wolves (Fig. 2b) and linear splines for predicted kill occurrence ( $\Delta\text{QIC} = 126.73$ ), kill density  
424 ( $\Delta\text{QIC} = 95.28$ ), openness ( $\Delta\text{QIC} = 200.98$ ), and wolf density ( $\Delta\text{QIC} = 35.28$ ; Appendix S6).  
425 The best-fit space  $\times$  activity model included a time lag of 2 hour (kill density, openness, wolf  
426 density) or 3 hours (predicted kill occurrence; Appendix S6). Five-fold cross validation revealed  
427 strong correlations between observed and predicted values for the best-fit space  $\times$  activity  
428 models that included predicted kill occurrence (mean Spearman-rank correlation,  $r_s = 0.99$ ),  
429 openness ( $r_s = 0.99$ ), and kill density ( $r_s = 0.97$ ). Correlations of this magnitude indicate that

430 these models are reliable. By contrast, the reliability of the model that included wolf density was  
431 poorer ( $r_s = 0.67$ ), consistent with earlier findings that wolf density is an inaccurate index of  
432 spatial risk in northern YNP due to wolf packs displacing one another from the best hunting  
433 grounds where they kill elk (Kauffman et al. 2007). We therefore excluded the wolf density  
434 model from further consideration.

435 Negative space  $\times$  activity interactions before or after thresholds in predicted kill  
436 occurrence ( $P < 0.001$ ; before threshold), kill density ( $P < 0.001$ ; after threshold), and openness  
437 ( $P < 0.001$ ; before and after threshold; Appendix S7) showed that elk avoided open grasslands  
438 and places where kills occurred when wolf activity was high, but selected for these places when  
439 wolf activity was low (Fig. 3a-c). Habitat selection probably did not vary beyond a predicted kill  
440 occurrence of 4.5 (Fig. 3a;  $P = 0.87$ ; Appendix S7) because there were few places where the  
441 predicted kill occurrence was more than 4.5 times the average kill probability; together, these  
442 places comprised only 7% of the study area.

443 To assess the time of day that elk selected for risky places, we calculated the bi-hourly  
444 frequency that elk steps ended in these places. A place was ‘risky’ if it exceeded the average  
445 value of a spatial risk index measured across all available locations in the study area. For  
446 example, 10.5% of 4084 elk steps ending in places that exceeded the study area’s mean predicted  
447 kill occurrence (4.5) happened at 0400-0500, whereas 5.5% of these steps happened at 1200-  
448 1300 (Fig. 3d). Steps ending in risky places were most frequent from 2200-0500, which  
449 corresponded to the nightly lull in wolf activity (Fig. 3d-f).

450 To illustrate the effects of diel wolf activity on the elk LOF, we focused on kill density in  
451 a portion of our study area (Fig. 4a). Using our best-fit space  $\times$  activity model for this index (Fig.  
452 4b), we show that places where kills were densely concentrated were valleys (low perceived

453 predation risk) when wolf activity was low (Fig. 4c) and peaks (high perceived predation risk)  
454 when wolf activity was high (Fig. 4d). Wolf downtime allowed elk to use places where wolves  
455 were more likely to kill them, flattening the LOF every night for about 12 hours (Fig. 3d-f, Video  
456 S1). This may explain why prime-aged (2-11 years-old) elk in our sample were in excellent body  
457 condition (% ingesta-free body fat;  $\bar{x} \pm SE = 10.12 \pm 0.18$ ,  $n = 13$ ) with high pregnancy rates  
458 ( $0.89 \pm 0.11$ ,  $n = 15$ ) when radio-collared at midwinter.

459

460

## DISCUSSION

461 The LOF has been proposed as a possible unifying concept in ecology that explains  
462 animal behavior, population dynamics, and trophic interactions across diverse ecosystems  
463 (Brown and Kotler 2004, Schmitz 2005, Heithaus et al. 2009, Laundré et al. 2010; Catano et al.  
464 2016). It has also been argued that effective ecological restoration may depend on reestablishing  
465 landscapes of fear because fear may be as or more important than direct killing in structuring  
466 food webs and modifying ecosystem function (Manning et al. 2009, Suraci et al. 2016). Doubts  
467 about the conceptual and practical importance of the LOF stem from a dearth of information  
468 about it how it operates across large spatial scales in free-living systems involving apex predators  
469 and highly mobile prey (Hammerschlag et al. 2015). We addressed this gap with extensive data  
470 from the Yellowstone elk-wolf case study that was the original basis for the LOF concept.

471 An important aspect of our study is that we measured the LOF as a spatial mapping of  
472 time allocation (avoiding risky places and times). This approach accords with the original and  
473 widely applied definition of a LOF as a spatial mapping of “any measure of fear” (Laundré et al.  
474 2001, 2010), but differs from the definition of a LOF as a spatial mapping of an animal’s  
475 foraging cost of predation (Brown and Kotler 2004). The latter is calculated from giving-up

476 densities which are difficult to measure across vast landscapes like the one we studied (see  
477 Bedoya-Perez et al. 2013 for details about the practical uses of giving-up densities). Reconciling  
478 the two definitions is important because analyses of a single fear response may describe a  
479 landscape that is qualitatively different from a landscape of predation foraging cost, which is an  
480 integrative measure of fear that accounts for potential differences in how animal vigilance and  
481 time allocation vary with predation risk. For example, if an animal increases its vigilance while  
482 foraging in risky places, these places will appear as valleys in a map of time allocation and as  
483 peaks in a map of predation foraging cost, thus masking potential ecological effects of fear.  
484 Alternatively, if an animal manages risk mainly with time allocation (keeping vigilance constant  
485 across safe and risky places), or if vigilance and time allocation respond similarly to temporal  
486 variation in risk (decreasing vigilance while foraging in risky places at safe times; Lima and  
487 Bednekoff 1999), then the two maps will agree. Constant vigilance provides perfect agreement  
488 (Brown 1999), whereas vigilance that covaries with time allocation may provide relatively less  
489 relief (lower peaks, shallower valleys) in the map of time allocation, thus underestimating the  
490 foraging cost of predation.

491 Evidence that adult female elk in northern Yellowstone (and adjacent areas) maintain  
492 constant vigilance levels across habitats that vary in wolf predation risk (high vs. low wolf  
493 densities, near vs. far from forest cover: Childress and Lung 2003; Lung and Childress 2007;  
494 Winnie and Creel 2007; Creel et al. 2008; Liley and Creel 2008) suggests our map of time  
495 allocation (Fig. 4c-d) matches a map of predation foraging cost. These elk increase vigilance  
496 levels only when wolves are an immediate threat (Winnie and Creel 2007; Creel et al. 2008; Lily  
497 and Creel 2008; Gower et al. 2009; Middleton et al. 2013) because they can simultaneously  
498 process their food and scan their surroundings (Fortin et al. 2004; Gower et al. 2009) as well as

499 escape wolves that attack them (MacNulty et al. 2012; Mech et al. 2015). In general, animals,  
500 especially food-limited ones, are expected to use little or no vigilance when they can escape  
501 predators in the absence of vigilance (Brown 1999).

502         On the other hand, if elk vigilance is sensitive to short-term ( $\leq 24$  hours) temporal  
503 variation in wolf predation risk as many studies report (Winnie and Creel 2007; Creel et al. 2008;  
504 Lily and Creel 2008; Gower et al. 2009; Middleton et al. 2013), then elk may increase vigilance  
505 in risky places during periods of the diel cycle when wolves are most active. This is an open  
506 question because studies have yet to test how spatial variation in elk vigilance changes across the  
507 diel cycle. Nevertheless, theory predicts that an animal's vigilance level (and its predation  
508 foraging cost) should track its predator encounter rate which is itself a function of predator  
509 activity level (Houston et al. 1993; Brown 1999; Lima and Bednekoff 1999). If so, elk should  
510 reduce vigilance when foraging in risky places during lulls in wolf activity when encounters are  
511 infrequent (Fig. 2a) leading to a map of predation foraging cost with more relief than is evident  
512 in our map of time allocation (Fig. 4c-d).

513         We make three important advances with our results. First, we provide a quantified  
514 example of a LOF at an unprecedented large scale. Quantified examples are rarer than a casual  
515 survey of the literature may suggest because authors often misdefine a LOF as spatial variation  
516 in predation risk (e.g., Kauffman et al. 2010, Catano et al. 2016) or an animal's unmapped  
517 response to spatial risk (e.g., Avgar et al. 2015, Hammerschlag et al. 2015, Lyly et al. 2015).  
518 Relatively few studies have quantified a spatially-explicit map of an animal's response to  
519 predation risk in accord with the LOF concept. These focused on marine invertebrates (Matasa  
520 and Trussell 2011), rodents (van der Merwe and Brown 2008; Abu Baker and Brown 2010),  
521 ungulates (Shrader et al. 2008; Druce et al. 2009, Iribarren and Kotler 2012), and primates

522 (Willems and Hill 2009, Emerson et al. 2011, Coleman and Hill 2014) at small spatial scales (< 2  
523 km<sup>2</sup>). Our example is the only one that spans a large-scale (1000-km<sup>2</sup>) landscape. We  
524 accomplished this by combining movement data from individually-marked, wide-ranging  
525 animals and spatial data describing continuous change in landscape attributes associated with  
526 predation risk (kill site locations, vegetation cover). Moving forward, animal-borne transmitters,  
527 especially those with accelerometers that permit fine-scale behavioral inferences (Mosser et al.  
528 2014, Collins et al. 2015), together with remotely-sensed spatial risk data (e.g., vegetation cover)  
529 may provide the most practical method to estimate landscapes of fear across ecologically-  
530 relevant scales.

531         Second, we demonstrate that diel predator activity is a crucial driver of a LOF. In the  
532 large-scale, free-living system we studied, the mere presence of a predator was a necessary but  
533 insufficient condition to stimulate a LOF. Had we adopted the classic fixed risk assumption of  
534 constant attack over time (Lima 2002) by ignoring diel predator activity, we would have  
535 concluded, incorrectly, that our focal prey population had little fear of risky places (Appendix  
536 S5). Instead, our consideration of diel predator activity revealed a LOF with peaks and valleys  
537 that oscillated across the diel cycle according to the predator's activity rhythm (Fig. 4, Video  
538 S1). This temporally-sensitive response aligns with the 'risk allocation hypothesis' (Lima and  
539 Bednekoff 1999) which predicts that animals in high-risk environments take maximal advantage  
540 of safe times to forage in risky places, and with numerous day-night and light-dark comparisons  
541 that show how many taxa (e.g., zooplankton, rodents, and ungulates) use risky places at times of  
542 the day when predator activity or hunting ability is minimal (Lima and Dill 1990, Lima 1998,  
543 Brown and Kotler 2004, Caro 2005, Fischhoff et al. 2007, Tambling et al. 2012, Burkepile et al.  
544 2013, Palmer et al. 2017).



545           However, previous studies of diel predator effects on prey habitat use neither quantified a  
546 LOF nor linked it to measured variation in diel predator activity as we did. These studies only  
547 compared habitat use between day and night, or light and dark periods. This approach would  
548 have obscured our results because wolf activity was a complex function of time of day that did  
549 not neatly fit the conventional dichotomy of safe and dangerous periods (Fig. 2). As far as we  
550 know, our study is the first to quantify how continuous variation in spatial predation risk (Fig. 1)  
551 and diel predator activity (Fig. 2) interact with one another to affect an animal's habitat selection  
552 (Appendix S7, Fig. 3) and, ultimately, its LOF (Fig. 4, Video S1). Ecologists have only recently  
553 started to investigate the influence of diel predator activity on animal habitat selection (Fischhoff  
554 et al. 2007, Tambling et al. 2012, Burkepile et al. 2013). Many of the classic studies of diel  
555 predator effects, including zooplankton diel vertical migration (Iwasa 1982) and rodent response  
556 to moonlight (Kotler et al. 1991), considered diel changes in the ocular capability of visual  
557 predators (Gibson et al. 2009, Upham and Hafner 2013) rather than diel predator activity per se.  
558 This aspect of predator-prey interactions deserves more attention because the prevalence of diel  
559 activity patterns in apex predators across diverse ecosystems (e.g., Theuerkauf et al. 2003, Roth  
560 and Lima 2007, Whitney et al. 2007, Andrews et al. 2009, Cozzi et al. 2012) suggests that it is a  
561 potentially common driver of landscapes of fear.

562           Diel predator activity was an important driver of the landscape of fear in the system we  
563 studied because it was a valid source of risk that prey could evidently perceive. Wolves are  
564 cursorial hunters that find and select prey by actively searching the environment and visually  
565 identifying vulnerable prey that are safe to kill (MacNulty et al. 2007, Mech et al. 2015). As a  
566 result, the risk of wolf predation is low when wolves are not highly active. This is illustrated in  
567 our data by how the frequency at which wolves encountered, attacked, and killed elk mirrored

568 changes in wolf activity levels (Fig. 2a). The low levels of nighttime activity that we documented  
569 is consistent with the hypothesis that wolves avoid hunting at night because their vision is best  
570 adapted to crepuscular light (Kavanau and Ramos 1975, Roper and Ryan 1977, Theurerkauf  
571 2009). This may explain why wolves in Yellowstone and most other regions exhibit a  
572 crepuscular activity pattern (Theurerkauf et al. 2003, Theurerkauf 2009).

573         The strong statistical association between elk habitat selection and diel wolf activity  
574 across three different measures of spatial risk (Appendix S7, Fig. 3) implies that elk perceived  
575 diel variation in wolf activity. How elk did this is not obvious from our data. The lagged  
576 influence of wolf activity on elk habitat selection (Appendix S7, Fig. 3d-f) suggests that elk did  
577 not perfectly perceive changes in wolf activity. Or it could reflect a deliberate tradeoff between  
578 safety and food in which elk accepted a higher likelihood of wolf encounter in exchange for  
579 more time in preferred foraging habitats. Support for this hypothesis is given by the temporal  
580 distribution of elk steps in risky places, which shows that elk minimized their steps in risky  
581 places after wolf activity peaked in the morning and started increasing their steps back into these  
582 places before wolf activity dipped in the afternoon (Fig. 3d-f). Elk probably tolerate a modest  
583 likelihood of wolf encounter because they often survive encounters (MacNulty et al. 2007, Mech  
584 et al. 2015). The success of wolves hunting elk in northern YNP during the study period rarely  
585 exceeded 20% (Smith et al. 2000, Mech et al. 2001) and dropped below 10% when wolves  
586 selected adult elk (MacNulty et al. 2012).

587         Our third key advance is that we provide the first approximation of the elk LOF that  
588 prevailed in northern YNP following wolf reintroduction in 1995-1997. This matters to the  
589 discipline of ecology and the practice of conservation because this particular case study is an  
590 empirical cornerstone in the LOF concept (Laundré et al. 2001, 2010). Moreover, this case study

591 is a seminal example in the broader debates about the ecological consequences of fear (Ripple  
592 and Beschta 2004, Zhanette et al. 2011) and the importance of apex predators to the structure and  
593 function of ecosystems (Terborgh and Estes 2010, Dobson 2014). Our central finding is that  
594 wolves established an elk LOF that was not as relentlessly intimidating as originally proposed  
595 and subsequently argued. On the contrary, our results indicate that wolves established a dynamic  
596 LOF that shifted hourly with the ebb and flow of wolf activity. Whereas previous studies  
597 reported that elk behaviorally abandoned risky places in response to the mere presence of  
598 wolves, our research reveals that elk maintained regular use of these areas during nightly lulls in  
599 wolf activity. This finding is important because many hypotheses about the ecological effects of  
600 the elk LOF in the Greater Yellowstone Ecosystem (GYE) assume that elk abandon risky places  
601 when wolves are present.

602 For example, the ‘predator-sensitive food hypothesis’ that fear of wolves decreases elk  
603 pregnancy rate via increased over-winter fat loss assumes that elk move into the protective cover  
604 of nutritionally-improverished forests when wolves are present, reducing their use of preferred  
605 grassland foraging habitats that have high predation risk (Creel et al. 2009). Although our study  
606 is the first to show how elk can safely use grasslands when wolves are present, prior studies of  
607 243 radiocollared elk across four GYE populations (northern Yellowstone, Madison headwaters,  
608 Lower Madison, Clarks Fork) have already demonstrated that wolf presence does not prevent elk  
609 from using grassland habitats (Fortin et al. 2005, Mao et al. 2005, Proffitt et al. 2009, White et al.  
610 2009a, Middleton et al. 2013a). Evidence that wolves exclude elk from grasslands is limited to a  
611 6.5-month study of 14 GPS-collared elk across two winters (2002-2003) in the Gallatin  
612 population (Creel et al. 2005), and a two-month study of elk fecal pellet density across two  
613 summers (1998-1999) in northern Yellowstone (Hernandez and Laundré 2005). Decreased elk

614 pellet density with distance from forest edge has been interpreted as evidence that “elk made a  
615 significant shift toward the forest edge” following wolf reintroduction (Laundré et al. 2010). This  
616 inference is questionable because fecal pellet counts are prone to bias from observer error and  
617 variation in fecal disappearance rates (e.g., Campbell et al. 2004, Jenkins and Manly 2008). It  
618 also has little bearing on the predator-sensitive food hypothesis which concerns changes in  
619 winter habitat use (Creel et al. 2009).

620 Fortin et al.’s (2005) 7-month study of 13 GPS-collared elk across two winters (2001-  
621 2002) in northern YNP is also frequently cited as evidence that wolves exclude elk from  
622 grasslands (e.g., Schmitz et al. 2008, Creel et al. 2009, Creel and Christianson 2009, Creel et al.  
623 2011). However, its results are more ambiguous than often acknowledged. Elk were found to  
624 prefer conifer forests to grasslands where wolves were numerous, but they were also *more* likely  
625 to use grasslands as local wolf densities increased (Fortin et al. 2005: Fig. 3). Confusing matters  
626 further, our 26-month study of 27 GPS-collared elk across four winters (2001-2004), which  
627 included the 13 animals from Fortin et al. (2005), indicated that wolf density was an unreliable  
628 predictor of elk habitat selection (Appendix S6) likely because wolf density was itself an  
629 inaccurate gauge of wolf predation risk (Kauffman et al. 2007). These issues highlight the  
630 preliminary quality of the results from Fortin et al. (2005).

631 In winter, our sample of 27 adult female elk used grasslands in northern YNP at night  
632 when wolves were relatively inactive (Fig. 3c, 3f). Body fat and blood serum data taken from  
633 these elk when radiocollared at mid-winter were consistent with the hypothesis that nocturnal use  
634 of preferred grassland foraging habitats was sufficient to offset the effects of wolf presence on  
635 elk over-winter fat loss and pregnancy rate. Prime-aged (2-11 yrs-old) animals carried enough  
636 body fat (10%) in February to maintain a high rate of pregnancy (89%) contrary to the predator-

637 sensitive food hypothesis. Although our sample is small (<16), the results agree with those from  
638 a larger sample of radiocollared elk (>90) from the same population and time period that  
639 included the sample we analyzed (Cook et al. 2004; White et al. 2011). They also agree with  
640 fetal data from 13,550 adult female, northern Yellowstone elk harvested in Montana (outside  
641 YNP) during the 1985-2008 late-season (Dec-Feb) antlerless hunts that indicated pregnancy rate  
642 was independent of wolf predation pressure (Proffitt et al. 2014).

643         Nocturnal use of grasslands may explain how other elk populations utilized these  
644 preferred foraging habitats, and why they too maintained relatively high levels of over-winter  
645 nutrition and/or pregnancy rate despite wolf presence (Hamlin et al. 2009; White et al. 2009b;  
646 Middleton et al. 2013a, b). Counter arguments are based on a potentially unreliable fecal-based  
647 pregnancy test of 4 elk populations (Creel et al. 2007, Garrott et al. 2009, White et al. 2011), a  
648 snow urine nutritional assay of the Gallatin population over an unspecified time period  
649 (Christianson and Creel 2010), and reviews of (un)published data (Creel et al. 2011, 2013). The  
650 latter includes a 32% drop in pregnancy rate in the Madison headwaters population (Garrott et al.  
651 2009) that was unrelated to nutrition (White et al. 2009b) and likely an artifact of small sample  
652 size and uncontrolled effects of age, which have a profound influence on elk pregnancy rate  
653 (Cook et al. 2004, Middleton et al. 2013b, Proffitt et al. 2014). Finally, the consistently  
654 crepuscular pattern of wolf activity (Fig. 2, Appendix S3; Theurerkauf 2009) suggests a degree  
655 of predictability in wolf predation risk that may explain why wolves have no effect on elk  
656 reproduction via chronic stress (Creel et al. 2009, Boonstra 2013).

657         Elk behavioral abandonment of risky places is also a key mechanism in the behaviorally  
658 mediated trophic cascade hypothesis, which asserts that fear of wolves increases productivity of  
659 palatable woody deciduous plants in risky places via reductions in elk browsing (Ripple and

660 Beschta 2004, Beyer et al. 2007, Kauffman et al. 2010, Winnie 2012, Peterson et al. 2015).  
661 Although population reduction via direct killing could also reduce elk browsing, evidence of an  
662 apparent trophic cascade in northern YNP in the decade after wolf reintroduction has been  
663 attributed to behavioral mechanisms in part because elk numbers remained high during that  
664 period (Ripple et al. 2001, Ripple and Beschta 2004, Ripple and Beschta 2006, Beyer et al. 2007,  
665 Ripple and Beschta 2012). We scrutinized the movements of every GPS-collared elk that was  
666 tracked in that area during that decade, including 11 previously unreported animals, and our  
667 results demonstrate that elk maintained access to aspen (*Populus tremuloides*) and willow (*Salix*  
668 spp.) within risky places during daily wolf downtimes. This inference contradicts initial reports  
669 from fecal pellet surveys and 13 GPS-collared elk indicating elk avoided aspen where wolves  
670 were numerous (Ripple et al. 2001, Fortin et al. 2005). However, it agrees with a winter habitat  
671 selection analysis of 80 VHF-collared elk followed in 2000-2002, concurrent to the 13 GPS-  
672 collared elk tracked by Fortin et al. (2005), and compared with 94 VHF-collared elk followed  
673 before wolf reintroduction in 1985-1990 (Mao et al 2005). This study found that elk *preferred*  
674 aspen where wolves were numerous depending on slope and snow levels, and that “elk showed  
675 no significant change in selection of aspen, which was highly preferred during winter in both  
676 pre- and post-wolf reintroduction periods” (Mao et al. 2005: Table 6). Assessing results from  
677 Fortin et al. (2005) and Mao et al. (2005) is difficult, however, because both studies relied on an  
678 unreliable index of spatial risk (wolf density; Appendix S6) and an unvalidated GIS layer for  
679 aspen.

680           Nevertheless, elk nocturnal use of areas of high predicted kill occurrence in 2001-2004  
681 (Fig. 3d) accords with separate aspen data taken in 2004-2007 that showed aspen in these same  
682 areas did not escape browsing (Kauffman et al. 2010). Similarly, elk avoided riparian areas with

683 willow only during dawn periods (Beyer 2006). This behavior may explain why many willow  
684 also did not escape browsing (Bilyeu et al. 2008, Marshall et al. 2013, 2014; but see Beyer et al.  
685 2007). Persistent browsing on aspen and willow was probably also related to how many of these  
686 plants existed outside of high-risk areas as defined by our indices of spatial risk (Appendix S8).  
687 These results, together with evidence that wolf-caused changes in elk distribution arise from  
688 wolves removing individuals rather than elk redistributing themselves (White et al. 2009a, 2010,  
689 2012), support the hypothesis that any indirect effect of wolves on woody deciduous plants is  
690 mainly the result of a density-mediated trophic cascade (Creel and Christianson 2009, Kauffman  
691 et al. 2010, Winnie 2012, Marshall et al. 2014, Painter et al. 2015).

692         Although our data are the best available information about the role of wolves in shaping  
693 the elk LOF in northern YNP during the first decade of wolf recovery, they are limited in at least  
694 three ways. First, the 5-hour interval between consecutive elk locations was coarse and a  
695 potential source of bias. This possibility is minimized by the fact that several studies have  
696 analyzed subsets of our data and established that the 5-hour interval provides a valid basis for  
697 understanding elk movement and habitat selection (Boyce et al. 2003, Fortin et al. 2005, Forester  
698 et al. 2007, 2009). Second, our estimated diel wolf activity pattern (Fig. 2) was derived from  
699 wolf GPS data collected over a 10-year period (2004-2013) that only partially overlapped our elk  
700 study period (2001-2004). This was necessary because GPS data for wolves in YNP were not  
701 available until 2004, and the number of wolves equipped with GPS collars each year was small  
702 (2-5 animals; Appendix S1). Nevertheless, our estimated diel pattern was most likely  
703 representative of the diel pattern during the non-overlapping years because it was: (1) correlated  
704 with the time of day that we directly observed wolves encountering ( $r = 0.79$ ) and killing ( $r =$   
705  $0.87$ ) elk during the non-overlapping years (Fig. 2a); (2) consistent across the years in which it

706 was measured (Appendix S3); and (3) similar to diel patterns described for other wolf  
707 populations (Eggermann et al. 2009, Theuerkauf et al. 2003, 2009, Vander Vennen et al. 2016).

708         Although wolves were the primary source of mortality for our study population (Evans et  
709 al. 2006), our study, like others before it, ignored the possibility that the elk LOF was shaped by  
710 multiple predator species (e.g., wolves and cougars). One reason this may be important is if  
711 different predator-specific activity schedules (crepuscular versus nocturnal) create conflicting  
712 spatiotemporal patterns of predation risk that require prey to prioritize their response to one  
713 predator at the expense of increasing their risk to another. In addition, our analysis did not  
714 address the long-term dynamics of the elk LOF. Our results could be an artifact of the potentially  
715 unique conditions that prevailed during our study period including a large and growing wolf  
716 population, a large but shrinking elk population, and moderate to severe drought conditions.  
717 Further research is necessary to determine if and how our estimate of the elk LOF may have  
718 changed during the second decade of wolves in northern YNP.

719         In summary, our major insight is that an animal's spatially-explicit perception of  
720 predation risk (i.e., its 'landscape of fear') over a large physical landscape tracks the daily  
721 activity pattern of its primary predator, enabling the animal to utilize risky places during predator  
722 downtimes, which in turn mitigates the impact of fear on animal resource use, nutritional  
723 condition, and reproduction. Our results highlight how a LOF in a large scale, behaviorally-  
724 sophisticated system like northern YNP is not a simple, unconditional function of a predator's  
725 mere presence. To assume so may overestimate the threat of predation, underestimate the ability  
726 of prey to efficiently manage this threat, and exaggerate the ecological effects of fear. We  
727 encourage investigators to recognize the potential for free-living animals to adaptively allocate  
728 habitat use across periods of high and low predator activity within the diel cycle. This



729 underappreciated aspect of animal behavior can help explain why strong antipredator responses  
730 (e.g., movement, vigilance) may have weak ecological effects, and why these effects may not  
731 rival those of direct killing. It also provides a basis for understanding why a LOF may have less  
732 relevance to conservation and management than direct killing.

733

734

#### ACKNOWLEDGEMENTS

735 This study was funded by the NSF (DEB-1245373; DEB-0078130), U.S. Geological  
736 Survey, National Geographic Society, Natural Sciences and Engineering Research Council of  
737 Canada, Alberta Conservation Association, Camp Fire Conservation Fund, Yellowstone Park  
738 Foundation, and National Park Service. MTK was supported by a S.J. and Jesse E. Quinney  
739 Fellowship from Utah State University. JA Merkle and PJ Mahoney provided helpful statistical  
740 advice, and JS Brown, BP Kotler, and one anonymous reviewer provided valuable feedback that  
741 improved the manuscript. Any use of trade or product names is for descriptive purposes only and  
742 does not imply endorsement by the U.S. Government.

743

744

#### LITERATURE CITED

745 Abu Baker M.A., and J.S. Brown. 2010. Islands of fear: effects of wooded patches on habitat  
746 suitability of the striped mouse in a South African grassland. *Functional Ecology*  
747 24:1313-1322.

748 Andrews, K. S., G. D. Williams, D. Farrer, N. Tolimieri, C. J. Harvey, G. Bargmann, and P. S.  
749 Levin. 2009. Diel activity patterns of sixgill sharks, *Hexanchus griseus*: the ups and  
750 downs of an apex predator. *Animal Behaviour* 78:525-536.

- 751 Avgar T., et al. 2015. Space-use behaviour of woodland caribou based on a cognitive movement  
752 model. *Journal of Animal Ecology* 84:1059-1070.
- 753 Bangs, E. E., and S. H. Fritts. 1996. Reintroducing the gray wolf to central Idaho and  
754 Yellowstone National Park. *Wildlife Society Bulletin* 24:402-413.
- 755 Basille, M., D. Fortin, C. Dussault, G. Bastille-Rousseau, J.-P. Ouellet, and R. Courtois. 2015.  
756 Plastic response of fearful prey to the spatiotemporal dynamics of predator distribution.  
757 *Ecology* 96:2622-2631.
- 758 Bedoya-Perez, M.A., A.J. Carthey, V.S. Mella, C. McArthur, and P.B. Banks. 2013. A practical  
759 guide to avoid giving up on giving-up densities. *Behavioral Ecology and Sociobiology*,  
760 67:1541-1553.
- 761 Beschta, R. L., and W. J. Ripple. 2013. Are wolves saving Yellowstone's aspen? A landscape-  
762 level test of a behaviorally mediated trophic cascade: comment. *Ecology* 94:1420-1425.
- 763 Beyer, H. L. 2006. Wolves, elk and willow on Yellowstone National Park's northern range.  
764 Thesis, University of Alberta, Edmonton, Canada.
- 765 Beyer, H. L., E. H. Merrill, N. Varley, and M. S. Boyce. 2007. Willow on Yellowstone's  
766 northern range: evidence for a trophic cascade? *Ecological Applications* 17:1563-1571.
- 767 Bilyeu, D. M., D. J. Cooper, and N. T. Hobbs. 2008. Water tables constrain height recovery of  
768 willow on Yellowstone's northern range. *Ecological Applications* 18:80-92.
- 769 Boonstra, R. 2013. Reality as the leading cause of stress: rethinking the impact of chronic stress  
770 in nature. *Functional Ecology* 27:11-23.
- 771 Boyce, M. S., J. S. Mao, E. H. Merrill, D. Fortin, M. G. Turner, J. Fryxell, and P. Turchin. 2003.  
772 Scale and heterogeneity in habitat selection by elk in Yellowstone National Park.  
773 *Ecoscience* 10:421-431.

- 774 Boyce, M. S., P. R. Vernier, S. E. Nielsen, and F. K. A. Schmiegelow. 2002. Evaluating resource  
775 selection functions. *Ecological Modelling* 157:281-300.
- 776 Brown, J. S. 1999. Vigilance, patch use and habitat selection: foraging under predation risk.  
777 *Evolutionary Ecology Research* 1:49-71.
- 778 Brown, J. S., and B. P. Kotler. 2004. Hazardous duty pay and the foraging cost of predation.  
779 *Ecology Letters* 7:999-1014.
- 780 Brown, J. S., J. W. Laundré, and M. Gurung. 1999. The ecology of fear: Optimal foraging, game  
781 theory, and trophic interactions. *Journal of Mammalogy* 80:385-399.
- 782 Burkepile, D. E., et al. 2013. Habitat selection by large herbivores in a southern African savanna:  
783 the relative roles of bottom-up and top-down forces. *Ecosphere* 4:139.
- 784 Campbell, D., G. Swanson, and J. Sales, J. 2004. Methodological insights: comparing the  
785 precision and cost-effectiveness of faecal pellet group count methods. *Journal of Applied*  
786 *Ecology* 41:1185-1196.
- 787 Caro, T. 2005. Antipredator defenses in birds and mammals. University of Chicago Press.,  
788 Chicago, New York, USA.
- 789 Catano, L. B., M. C. Rojas, R. J. Malossi, J. R. Peters, M. R. Heithaus, J. W. Fourqurean, and D.  
790 E. Burkepile. 2016. Reefscapes of fear: predation risk and reef heterogeneity interact to  
791 shape herbivore foraging behaviour. *Journal of Animal Ecology* 85:146-156.
- 792 Childress, M. J., and M. A. Lung. 2003. Predation risk, gender and the group size effect: does elk  
793 vigilance depend upon the behaviour of conspecifics? *Animal Behavior* 66:389-398.
- 794 Christianson, D., and S. Creel. 2010. A nutritionally mediated risk effect of wolves on elk.  
795 *Ecology* 91:1184-1191.

- 796 Christianson, D., and S. Creel. 2014. Ecosystem scale declines in elk recruitment and population  
797 growth with wolf colonization: a before-after-control-impact approach. PLoS ONE  
798 9(7):e102330.
- 799 Coleman, B. T., and R. A. Hill. 2014. Living in a landscape of fear: the impact of predation,  
800 resource availability and habitat structure on primate range use. Animal Behaviour  
801 88:165-173.
- 802 Collins, P. M., J. A. Green, V. Warwick-Evans, S. Dodd, P. J. Shaw, J. P. Arnould, and L. G.  
803 Halsey. 2015. Interpreting behaviors from accelerometry: a method combining simplicity  
804 and objectivity. Ecology and Evolution 5:4642-4654.
- 805 Cook, R. C., J. G. Cook, and L. D. Mech. 2004. Nutritional condition of northern Yellowstone  
806 elk. Journal of Mammalogy 85:714-722.
- 807 Cozzi, G., F. Broekhuis, J. W. McNutt, L. A. Turnbull, D. W. Macdonald, and B. Schmid. 2012.  
808 Fear of the dark or dinner by moonlight? Reduced temporal partitioning among Africa's  
809 large carnivores. Ecology 93:2590-2599.
- 810 Craiu, R. V., T. Duchesne, and D. Fortin. 2008. Inference methods for the conditional logistic  
811 regression model with longitudinal data. Biometrical Journal 50:97-109.
- 812 Creel, S. 2011. Toward a predictive theory of risk effects: hypotheses for prey attributes and  
813 compensatory mortality. Ecology 92:2190-2195.
- 814 Creel, S., and D. Christianson. 2009. Wolf presence and increased willow consumption by  
815 Yellowstone elk: implications for trophic cascades. Ecology 90:2454-2466.
- 816 Creel, S., J. Winnie, B. Maxwell, K. Hamlin, and M. Creel. 2005. Elk alter habitat selection as an  
817 antipredator response to wolves. Ecology 86:3387-3397.

- 818 Creel, S., J.A. Winnie, D. Christianson, S. and Liley. 2008. Time and space in general models of  
819 antipredator response: tests with wolves and elk. *Animal Behaviour*, 76:1139-1146.
- 820 Creel, S., J. A. Winnie, and D. Christianson. 2009. Glucocorticoid stress hormones and the effect  
821 of predation risk on elk reproduction. *Proceedings of the National Academy of Sciences*  
822 of the United States of America 106:12388-12393.
- 823 Creel, S., D. A. Christianson, and J. A. Winnie. 2011. A survey of the effects of wolf predation  
824 risk on pregnancy rates and calf recruitment in elk. *Ecological Applications* 21:2847-  
825 2853.
- 826 Creel, S., J. A. Winnie, and D. Christianson. 2013. Underestimating the frequency, strength and  
827 cost of antipredator responses with data from GPS collars: an example with wolves and  
828 elk. *Ecology and Evolution* 3:5189-5200.
- 829 Cubaynes, S., D. R. MacNulty, D. R. Stahler, K. A. Quimby, D. W. Smith, and T. Coulson.  
830 2014. Density-dependent intraspecific aggression regulates survival in northern  
831 Yellowstone wolves (*Canis lupus*). *Journal of Animal Ecology* 83:1344-1356.
- 832 Despain, D. G. 1990. Yellowstone vegetation: consequences of environment and history in a  
833 natural setting. Roberts Rinehart, Boulder, Colorado, USA.
- 834 Dobson, A. P. 2014. Yellowstone wolves and the forces that structure natural systems. *PLoS*  
835 *Biology* 12(12):e1002025.
- 836 Druce, D. J., J. S. Brown, G. I. H. Kerley, B. P. Kotler, R. L. MacKey, and R. Slotow. 2009.  
837 Spatial and temporal scaling in habitat utilization by klipspringers (*Oreotragus*  
838 *oreotragus*) determined using giving-up densities. *Austral Ecology* 34:577–587.

- 839 Eggermann, J., R. Gula, B. Pirga, J. Theuerkauf, H. Tsunoda, B. Brzezowska, S. Rous, and R.  
840 Stephan. 2009. Daily and seasonal variation in wolf activity in the Bieszczady  
841 Mountains, SE Poland. *Mammalian Biology* 74:159-163.
- 842 Emerson, S. E., J. S. Brown, and J. D. Linden. 2011. Identifying Sykes' monkeys',  
843 *Cercopithecus albogularis erythrarchus*, axes of fear through patch use. *Animal*  
844 *Behaviour* 81:455-462.
- 845 Ensing, E. P., S. Ciuti, F. A. L. M. de Wijs, D. H. Lentferink, A. ten Hoedt, M. S. Boyce, and R.  
846 A. Hut. 2014. GPS Based Daily Activity Patterns in European Red Deer and North  
847 American Elk (*Cervus elaphus*): Indication for a Weak Circadian Clock in Ungulates.  
848 *PLoS ONE* 9(9):e106997.
- 849 Evans, S.B., L.D. Mech, P.J. White, and G.A. Sargeant. 2006. Survival of adult female elk in  
850 Yellowstone following wolf restoration. *Journal of Wildlife Management* 70:1372-1378.
- 851 Fischhoff, I. R., S. R. Sundaresan, J. Cordingley, and D. I. Rubenstein. 2007. Habitat use and  
852 movements of plains zebra (*Equus burchelli*) in response to predation in danger from  
853 lions. *Behavioral Ecology* 18:725-729.
- 854 Ford, A. T., J. R. Goheen, T. O. Otieno, L. Bidner, L. A. Isbell, T. M. Palmer, D. Ward, R.  
855 Woodroffe, and R. M. Pringle. 2014. Large carnivores make savanna tree communities  
856 less thorny. *Science* 346:346-349.
- 857 Forester, J. D., A. R. Ives, M. G. Turner, D. P. Anderson, D. Fortin, H. L. Beyer, D. W. Smith,  
858 and M. S. Boyce. 2007. State-space models link elk movement patterns to landscape  
859 characteristics in Yellowstone National Park. *Ecological Monographs* 77:285-299.

- 860 Forester, J. D., H. K. Im, and P. J. Rathouz. 2009. Accounting for animal movement in  
861 estimation of resource selection functions: sampling and data analysis. *Ecology* 90:3554-  
862 3565.
- 863 Fortin, D., M. S. Boyce, E. H. Merrill, and J. M. Fryxell. 2004. Foraging costs of vigilance in  
864 large mammalian herbivores. *Oikos* 107:172-180.
- 865 Fortin, D., H. L. Beyer, M. S. Boyce, D. W. Smith, T. Duchesne, and J. S. Mao. 2005. Wolves  
866 influence elk movements: behavior shapes a trophic cascade in Yellowstone National  
867 Park. *Ecology* 86:1320-1330.
- 868 Garrott, R. A., P. J. White, and J. J. Rotella. 2009. The Madison headwaters elk herd:  
869 transitioning from bottom-up regulation to top-down limitation. Pages 489-517 *in*  
870 Garrott, R. A., P. J. White, and G. R. Watson, editors. *The ecology of large mammals in*  
871 *central Yellowstone: sixteen years of integrated field studies*. Elsevier, Oxford, UK.
- 872 Gervasi, V., H. Sand, B. Zimmermann, J. Mattisson, P. Wabakken, and J. D. C. Linnell. 2013.  
873 Decomposing risk: landscape structure and wolf behavior generate different predation  
874 patterns in two sympatric ungulates. *Ecological Applications* 23:1722-1734.
- 875 Gibson, R., R. Atkinson, and J. Gordon. 2009. Zooplankton diel vertical migration—a review of  
876 proximate control. *Oceanography and Marine Biology: An Annual Review* 47:77-110.
- 877 Gower, C.N., R. A. Garrott, and P. J. White. 2009. Elk foraging behavior: does predation risk  
878 reduce time for food acquisition? Pages 423-450 *in* Garrott, R. A., P. J. White, and G. R.  
879 Watson, editors. *The ecology of large mammals in central Yellowstone: sixteen years of*  
880 *integrated field studies*. Elsevier, Oxford, UK.
- 881 Gude, J. A., R. A. Garrott, J. J. Borkowski, and F. King. 2006. Prey risk allocation in a grazing  
882 ecosystem. *Ecological Applications* 16:285-298.

- 883 Hamlin, K. L., D. F. Pac, C. A. Sime, R. M. DeSimone, and G. L. Dusek. 2000. Evaluating the  
884 accuracy of ages obtained by two methods for Montana ungulates. *Journal of Wildlife*  
885 *Management* 64:441-449.
- 886 Hamlin, K. L., R. A. Garrott, P. J. White, and J. A. Cunningham. 2009. Contrasting wolf–  
887 ungulate interactions in the Greater Yellowstone Ecosystem. Pages 541-578 *in* Garrott, R.  
888 A., P. J. White, and G. R. Watson, editors. *The ecology of large mammals in central*  
889 *Yellowstone: sixteen years of integrated field studies*. Elsevier, Oxford, UK.
- 890 Hammerschlag, N., et al. 2015. Evaluating the landscape of fear between apex predatory sharks  
891 and mobile sea turtles across a large dynamic seascape. *Ecology* 96:2117-2126.
- 892 Hawlena, D., M. S. Strickland, M. A. Bradford, and O. J. Schmitz. 2012. Fear of predation slows  
893 plant-litter decomposition. *Science* 336:1434-1438.
- 894 Heithaus, M. R., A. J. Wirsing, D. Burkholder, and J. Thomson. 2009 Towards a predictive  
895 framework for predator risk effects: the interaction of landscape features and prey escape  
896 tactics. *Journal of Animal Ecology* 78:556–562.
- 897 Hernández, L., and J. W. Laundré. 2005. Foraging in the 'landscape of fear' and its implications  
898 for habitat use and diet quality of elk *Cervus elaphus* and bison *Bison bison*. *Wildlife*  
899 *Biology* 11:215-220.
- 900 Hopcraft, J. G. C., A. R. E. Sinclair and C. Packer. 2005. Planning for success: Serengeti lions  
901 seek prey accessibility rather than abundance. *Journal of Animal Ecology* 74:559-566.
- 902 Houston, D., B. 1982. *The northern Yellowstone elk: ecology and management*. Collier  
903 MacMillan, New York, New York, USA.
- 904 Houston, A.I., J.M. McNamara, and J.M.C. Hutchinson. 1993. General results concerning the



- 905 trade-off between gaining energy and avoiding predation. *Philosophical Transactions of*  
906 *the Royal Society of London B: Biological Sciences* 341:375–397.
- 907 Iribarren, C., and B. P. Kotler. 2012. Foraging patterns of habitat use reveal landscape of fear of  
908 Nubian ibex *Capra nubiana*. *Wildlife Biology* 18:194-201.
- 909 Iwasa, Y. 1982. Vertical migration of zooplankton: a game between predator and prey. *American*  
910 *Naturalist* 120:171-180.
- 911 Jenkins, K. J., and B. F. Manly. 2008. A double-observer method for reducing bias in fecal pellet  
912 surveys of forest ungulates. *Journal of Applied Ecology* 45:1339-1348.
- 913 Kauffman, M. J., J. F. Brodie, and E. S. Jules. 2010. Are wolves saving Yellowstone's aspen? A  
914 landscape-level test of a behaviorally mediated trophic cascade. *Ecology* 91:2742-2755.
- 915 Kauffman, M. J., J. F. Brodie, and E. S. Jules. 2013. Are wolves saving Yellowstone's aspen? A  
916 landscape-level test of a behaviorally mediated trophic cascade: reply. *Ecology* 94:1425-  
917 1431.
- 918 Kauffman, M. J., N. Varley, D. W. Smith, D. R. Stahler, D. R. MacNulty, and M. S. Boyce.  
919 2007. Landscape heterogeneity shapes predation in a newly restored predator-prey  
920 system. *Ecology Letters* 10:690-700.
- 921 Kavanau, J. L. and J. Ramos. 1975. Influences of light on activity and phasing of carnivores. *The*  
922 *American Naturalist* 109:391-418.
- 923 Kie, J. G. 1999. Optimal foraging and risk of predation: effects on behavior and social structure  
924 in ungulates. *Journal of Mammalogy* 80:1114-1129.
- 925 Kotler, B. P., J. S. Brown, and O. Hasson. 1991. Factors affecting gerbil foraging behavior and  
926 rates of owl predation. *Ecology* 72:2249-2260.

- 927 Laundré, J. W., L. Hernández, and K. B. Altendorf. 2001. Wolves, elk, and bison: reestablishing  
928 the "landscape of fear" in Yellowstone National Park, U.S.A. *Canadian Journal of*  
929 *Zoology* 79:1401-1409.
- 930 Laundré, J. W., L. Hernández, and W. J. Ripple. 2010. The landscape of fear: ecological  
931 implications of being afraid. *Open Ecology Journal* 3:1-7.
- 932 Liley, S., and S. Creel. 2008. What best explains vigilance in elk: characteristics of prey,  
933 predators, or the environment? *Behavioural Ecology* 19:245-254.
- 934 Lima, S. L. 1998. Nonlethal effects in the ecology of predator-prey interactions - what are the  
935 ecological effects of anti-predator decision-making? *Bioscience* 48:25-34.
- 936 Lima, S. L. 2002. Putting predators back into behavioral predator-prey interactions. *Trends in*  
937 *Ecology and Evolution* 17:70-75.
- 938 Lima, S. L., and L. M. Dill. 1990. Behavioral decisions made under the risk of predation: a  
939 review and prospectus. *Canadian Journal of Zoology* 68:619-640.
- 940 Lima, S. L., and P. A. Bednekoff. 1999. Temporal variation in danger drives antipredator  
941 behavior: the predation risk allocation hypothesis. *American Naturalist* 153:649-659.
- 942 Lima, S., and T. Steury. 2005. Perception of predation risk: the foundation of nonlethal predator–  
943 prey interactions. Pages 166-188 *in* P. Barbosa and I. Castellanos, editors. *Ecology of*  
944 *predator-prey interactions*. Oxford University Press, Oxford, UK.
- 945 Lone, K., L. E. Loe, T. Gobakken, J. D. Linnell, J. Odden, J. Remmen, and A. Mysterud. 2014.  
946 Living and dying in a multi-predator landscape of fear: roe deer are squeezed by  
947 contrasting pattern of predation risk imposed by lynx and humans. *Oikos* 123:641-651.

- 948 Lyly, M.S., A. Villers, E. Koivisto, P. Helle, T. Ollila, and E. Korpimäki. 2015. Avian top  
949 predator and the landscape of fear: responses of mammalian mesopredators to risk  
950 imposed by the golden eagle. *Ecology and Evolution* 5:503-514.
- 951 Lung, M.A., and M.J. Childress, M.J. 2007. The influence of conspecifics and predation risk on  
952 the vigilance of elk (*Cervus elaphus*) in Yellowstone National Park. *Behavioral Ecology*  
953 18:12-20.
- 954 MacNulty, D. R., D. W. Smith, L. D. Mech, J. A. Vucetich, and C. Packer. 2012. Nonlinear  
955 effects of group size on the success of wolves hunting elk. *Behavioral Ecology* 23:75–82.
- 956 MacNulty, D. R., L. D. Mech, and D. W. Smith. 2007. A proposed ethogram of large-carnivore  
957 predatory behavior, exemplified by the wolf. *Journal of Mammalogy* 88:595-605.
- 958 Madin, E. M. P., J. S. Madin, and D. J. Booth. 2011. Landscape of fear visible from space.  
959 *Scientific Reports*. 1(14). doi:10.1038/srep00014
- 960 Manning, A. D., I. J. Gordon, and W. J. Ripple. 2009. Restoring landscapes of fear with wolves  
961 in the Scottish Highlands. *Biological Conservation* 142:2314-2321.
- 962 Mao, J. S., M. S. Boyce, D. W. Smith, F. J. Singer, D. J. Vales, J. M. Vore, and E. H. Merrill.  
963 2005. Habitat selection by elk before and after wolf reintroduction in Yellowstone  
964 National Park. *Journal of Wildlife Management* 69:1691-1707.
- 965 Marshall, K. N., D. J. Cooper, and N. T. Hobbs. 2014. Interactions among herbivory, climate,  
966 topography and plant age shape riparian willow dynamics in northern Yellowstone  
967 National Park, USA. *Ecology* 102:667-677.
- 968 Marshall, K. N., N. T. Hobbs, and D. J. Cooper. 2013. Stream hydrology limits recovery of  
969 riparian ecosystems after wolf reintroduction. *Proceedings of the Royal Society of*  
970 *London B: Biological Sciences*, 280:20122977.

- 971 Matassa, C. M., and G. C. Trussell. 2011. Landscape of fear influences the relative importance of  
972 consumptive and nonconsumptive predator effects. *Ecology* 92:2258-2266.
- 973 Mattson, D., K. Barber, R. Maw, and R. Renken. 1998. Coefficients of productivity for  
974 Yellowstone's grizzly bear habitat. Technical Report. U.S. Geological Survey, Biological  
975 Resources Division, Moscow, ID,  
976 USA.<http://www.nwrc.usgs.gov/wdb/pub/others/grixzzly.pdf>
- 977 Mech, L.D., D.W. Smith, and D.R. MacNulty. 2015. *Wolves on the hunt: the behavior of wolves*  
978 *hunting wild prey*. University of Chicago Press, Chicago, Illinois, USA.
- 979 Mech, L.D., D.W. Smith, K.M. Murphy and D.R. MacNulty. 2001. Winter severity and wolf  
980 predation on a formerly wolf-free elk herd. *Journal of Wildlife Management* 65:998–  
981 1003.
- 982 Metz, M.C., D.W. Smith, J.A. Vucetich, D.R. Stahler, and R.O. Peterson. 2012. Seasonal  
983 patterns of predation for gray wolves in the multi-prey system of Yellowstone National  
984 Park. *Journal of Animal Ecology* 81: 553-563.
- 985 Middleton, A. D., M. J. Kauffman, D. E. McWhirter, M. D. Jimenez, R. C. Cook, J. G. Cook, S.  
986 E. Albeke, H. Sawyer, and P. J. White. 2013a. Linking anti-predator behaviour to prey  
987 demography reveals limited risk effects of an actively hunting large carnivore. *Ecology*  
988 *Letters* 16:1023-1030.
- 989 Middleton, A. D., M. J. Kauffman, D. E. McWhirter, J. G. Cook, R. C. Cook, A. A. Nelson, M.  
990 D. Jimenez, and R. W. Klaver. 2013b. Animal migration amid shifting patterns of  
991 phenology and predation: lessons from a Yellowstone elk herd. *Ecology* 94:1245-1256.
- 992 Mitchell, W. A., and S. L. Lima. 2002. Predator-prey shell games: large-scale movement and its  
993 implications for decision-making by prey. *Oikos* 99:249-259.

- 994 Moll, R. J., K. M. Redilla, T. Mudumba, A. B. Muneza, S. M. Gray, L. Abade, M. W. Hayward,  
995 J. J. Millspaugh, and R. A. Montgomery. 2017. The many faces of fear: a synthesis of the  
996 methodological variation in characterizing predation risk. *Journal of Animal Ecology*  
997 86:749-765.
- 998 Mosser, A. A., T. Avgar, G. S. Brown, C. S. Walker, and J. M. Fryxell. 2014. Towards an  
999 energetic landscape: broad-scale accelerometry in woodland caribou. *Journal of Animal*  
1000 *Ecology* 83:916-922.
- 1001 Noyes, J. H., R. G. Sasser, B. K. Johnson, L. D. Bryant, and B. Alexander. 1997. Accuracy of  
1002 pregnancy detection by serum protein (PSPB) in elk. *Wildlife Society Bulletin* 25:695–  
1003 698.
- 1004 Painter, L. E., R. L. Beschta, E. J. Larsen and W. J. Ripple. 2015. Recovering aspen follow  
1005 changing elk dynamics in Yellowstone: evidence of a trophic cascade? *Ecology* 96:252-  
1006 263.
- 1007 Palmer, M. S., J. Fieberg, A. Swanson, M. Kosmala, and C. Packer. 2017. A ‘dynamic’  
1008 landscape of fear: prey responses to spatiotemporal variations in predation risk across  
1009 the lunar cycle. *Ecology Letters* doi: 10.1111/ele.12832.
- 1010 Pan, W. 2001. Akaike's information criterion in generalized estimating equations. *Biometrics*  
1011 57:120-125.
- 1012 Peterson, R. O., J. A. Vucetich, J. M. Bump, and D. W. Smith. 2014. Trophic cascades in a  
1013 multicausal world: Isle Royale and Yellowstone. *Annual Review of Ecology, Evolution,*  
1014 *and Systematics* 45:325-345.
- 1015 Preisser, E. L., D. I. Bolnick, and M. F. Benard. 2005. Scared to death? the effects of  
1016 intimidation and consumption in predator-prey interactions. *Ecology* 86:501-509.

- 1017 Preisser, E. L., J. L. Orrock, and O. J. Schmitz. 2007. Predator hunting mode and habitat domain  
1018 alter nonconsumptive effects in predator-prey interactions. *Ecology* 88:2744-2751.
- 1019 Proffitt, K. M., J. A. Cunningham, K. L. Hamlin, and R. A. Garrott. 2014. Bottom-up and top-  
1020 down influences on pregnancy rates and recruitment of northern Yellowstone elk. *The*  
1021 *Journal of Wildlife Management* 78:1383-1393.
- 1022 Proffitt, K. M., J. L. Grigg, K. L. Hamlin, and R. A. Garrott. 2009. Contrasting effects of wolves  
1023 and human hunters on elk behavioral responses to predation risk. *Journal of Wildlife*  
1024 *Management* 73:345-356.
- 1025 Ripple, W. J., and R. L. Beschta. 2004. Wolves and the ecology of fear: Can predation risk  
1026 structure ecosystems? *Bioscience* 54:755-766.
- 1027 Ripple, W. J., and R. L. Beschta. 2006. Linking wolves to willows via risk-sensitive foraging by  
1028 ungulates in the northern Yellowstone ecosystem. *Forest ecology and management*, 230:  
1029 96-106.
- 1030 Ripple, W. J., and R. L. Beschta. 2012. Trophic cascades in Yellowstone: The first 15 years after  
1031 wolf reintroduction. *Biological Conservation* 145:205-213.
- 1032 Ripple, W. J., E. J. Larsen, R. A. Renkin, and D. W. Smith. 2001. Trophic cascades among  
1033 wolves, elk and aspen on Yellowstone National Park's northern range. *Biological*  
1034 *Conservation* 102:227-234.
- 1035 Roper, T. and J. Ryon. 1977. Mutual synchronization of diurnal activity rhythms in groups of red  
1036 wolf/coyote hybrids. *Journal of Zoology* 182:177-185.
- 1037 Roth, T. C., and S. L. Lima. 2007. The predatory behavior of wintering *Accipiter* hawks:  
1038 temporal patterns in activity of predators and prey. *Oecologia* 152:169-178.

- 1039 Sasser, R. G., C. A. Ruder, K. A. Ivani, J. E. Butler, and W. C. Hamilton. 1986. Detection of  
1040 pregnancy by radioimmunoassay of a novel pregnancy-specific protein in serum of cows  
1041 and a profile of serum concentration during gestation. *Biology of Reproduction* 35:936-  
1042 942.
- 1043 Schmitz, O. J., A. P. Beckerman, and K. M. O'Brien. 1997. Behaviorally mediated trophic  
1044 cascades: effects of predation risk on food web interactions. *Ecology* 78:1388-1399.
- 1045 Schmitz, O. J., J. H. Grabowski, B. L. Peckarsky, E. L. Preisser, G. C. Trussell, and J. R.  
1046 Vonesh. 2008. From individuals to ecosystem function: toward an integration of  
1047 evolutionary and ecosystem ecology. *Ecology* 89:2436-2445.
- 1048 Schmitz, O.J. 2005. Scaling from plot experiments to landscapes: studying grasshoppers to  
1049 inform forest ecosystem management. *Oecologia* 145:224-233.
- 1050 Schrader, A. M., J. S. Brown, G. I. Kerley, and B. P. Kotler. 2008. Do free-ranging domestic  
1051 goats show 'landscapes of fear'? Patch use in response to habitat features and predator  
1052 cues. *Journal of Arid Environments* 72:1811-1819.
- 1053 Sikes, R. S. 2016. Guidelines of the American Society of Mammalogists for the use of wild  
1054 mammals in research and education. *Journal of Mammalogy* 97:663-688.
- 1055 Smith D. W., L. D. Mech, M. Meagher, W. E. Clark, R. Jaffe, M. K. Phillips and J. A. Mack.  
1056 2000. Wolf-bison interactions in Yellowstone National Park. *Journal of Mammalogy*  
1057 81:1128–1135.
- 1058 Smith, D. W., T. D. Drummer, K. M. Murphy, D. S. Guernsey, and S. B. Evans. 2004. Winter  
1059 prey selection and estimation of wolf kill rates in Yellowstone National Park, 1995–2000.  
1060 *Journal of Wildlife Management* 68:153-166.

- 1061 Suraci, J. P., M. Clinchy, L. M. Dill, D. Roberts and L. Y. Zanette. 2016. Fear of large carnivores  
1062 causes a trophic cascade. *Nature Communications* 7(10698). doi:10.1038/ncomms10698.
- 1063 Tambling, C. J., D. J. Druce, M. W. Hayward, J. G. Castley, J. Adendorff, and G. I. H. Kerley.  
1064 2012. Spatial and temporal changes in group dynamics and range use enable anti-predator  
1065 responses in African buffalo. *Ecology* 93:1297-1304.
- 1066 Terborgh, J., and J. A. Estes. 2010. *Trophic cascades: predators, prey, and the changing*  
1067 *dynamics of nature*. Island Press, Washington, D.C., USA.
- 1068 Thaker, M., A. T. Vanak, C. R. Owen, M. B. Ogden, S. M. Niemann, and R. Slotow. 2011.  
1069 Minimizing predation risk in a landscape of multiple predators: effects on the spatial  
1070 distribution of African ungulates. *Ecology* 92:398-407.
- 1071 Theuerkauf, J. 2009. What drives wolves: fear or hunger? Humans, diet, climate and wolf  
1072 activity patterns. *Ethology* 115:649-657.
- 1073 Theuerkauf, J., W. Jedrzejewski, K. Schmidt, H. Okarma, I. Ruczynski, S. Sniezko, and R. Gula.  
1074 2003. Daily patterns and duration of wolf activity in the Bialowieza Forest, Poland.  
1075 *Journal of Mammalogy* 84:243-253.
- 1076 Upham, N.S. and J. C. Hafner. 2013. Do nocturnal rodents in the Great Basin Desert avoid  
1077 moonlight? *Journal of Mammalogy* 94:59-72.
- 1078 Valeix, M., A. J. Loveridge, S. Chamaille-Jammes, Z. Davidson, F. Murindagomo, H. Fritz, and  
1079 D. W. Macdonald. 2009. Behavioral adjustments of African herbivores to predation risk  
1080 by lions: spatiotemporal variations influence habitat use. *Ecology* 90:23-30.
- 1081 van der Merwe, M., and J. S. Brown. 2008. Mapping the landscape of fear of the cape ground  
1082 squirrel (*Xerus inauris*). *Journal of Mammalogy* 89:1162-1169.



- 1083 Vander Vennen, L. M., B. R. Patterson, A. R. Rodgers, S. Moffatt, M. L. Anderson, and J. M.  
1084 Fryxell. 2016. Diel movement patterns influence daily variation in wolf kill rates on  
1085 moose. *Functional Ecology* doi: 10.1111/1365-2435.12642
- 1086 White, P.J., R. A. Garrott, S. Cherry, F. G. R. Watson, C. N. Gower, M. S. Becker, and E.  
1087 Meredith. 2009a. Changes in elk resource selection and distribution with the  
1088 reestablishment of wolf predation risk. Pages 451-476 *in* Garrott, R. A., P. J. White, and  
1089 G. R. Watson, editors. *The ecology of large mammals in central Yellowstone: sixteen*  
1090 *years of integrated field studies*. Elsevier, Oxford, UK.
- 1091 White, P. J., R. A. Garrott, J. J. Borkowski, K. L. Hamlin, and J. G. Berardinelli. 2009b. Elk  
1092 nutrition after wolf recolonization of central Yellowstone. Pages 477-488 *in* Garrott, R.  
1093 A., P. J. White, and G. R. Watson, editors. *The ecology of large mammals in central*  
1094 *Yellowstone: sixteen years of integrated field studies*. Elsevier, Oxford, UK.
- 1095 White, P. J., K. M. Proffitt, L. D. Mech, S. B. Evans, J. A. Cunningham, and K. L. Hamlin. 2010.  
1096 Migration of northern Yellowstone elk: implications of spatial structuring. *Journal of*  
1097 *Mammalogy* 91:827-837.
- 1098 White, P. J., R. A. Garrott, K. L. Hamlin, R. C. Cook, J. G. Cook, and J. A. Cunningham. 2011.  
1099 Body condition and pregnancy in northern Yellowstone elk: evidence for predation risk  
1100 effects? *Ecological Applications* 21:3-8.
- 1101 White, P. J., K. M. Proffitt, and T. O. Lemke. 2012. Changes in elk distribution and group sizes  
1102 after wolf restoration. *The American Midland Naturalist* 167:174-187.
- 1103 Whitney, N. M., Y. P. Papastamatiou, K. N. Holland, and C. G. Lowe. 2007. Use of an  
1104 acceleration data logger to measure diel activity patterns in captive whitetip reef sharks,  
1105 *Triaenodon obesus*. *Aquatic Living Resources* 20:299-305.

- 1106 Willems, E. P., and R. A. Hill. 2009. Predator-specific landscapes of fear and resource  
1107 distribution: effects on spatial range use. *Ecology* 90:546-555.
- 1108 Winnie, J. and S. Creel, S. 2007. Sex-specific behavioural responses of elk to spatial and  
1109 temporal variation in the threat of wolf predation. *Animal Behaviour* 73: 215-225.
- 1110 Winnie Jr, J. A. 2012. Predation risk, elk, and aspen: tests of a behaviorally mediated trophic  
1111 cascade in the Greater Yellowstone Ecosystem. *Ecology* 93:2600-2614.
- 1112 Zanette, L. Y., A. F. White, M. C. Allen, and M. Clinchy. 2011. Perceived predation risk reduces  
1113 the number of offspring songbirds produce per year. *Science* 334:1398-1401.
- 1114 Zanette, L. Y., M. Clinchy, and J. P. Suraci. 2014. Diagnosing predation risk effects on  
1115 demography: can measuring physiology provide the means? *Oecologia* 176:637-651.

1116

1117

## FIGURES

1118 **Figure 1** Spatial variation in wolf predation risk during winter in northern Yellowstone National  
1119 Park was indexed as (a) predicted occurrence of wolf-killed adult male, adult female, and calf  
1120 elk, (b) density of wolf-killed adult female and calf elk, (c) openness, and (d) density of wolves.  
1121 (a, b, and d) illustrate conditions during the first year of the study (2001). Openness was  
1122 consistent across years. Black lines denote roads.

1123

1124 **Figure 2** Diel activity patterns of wolves and elk during winter in northern Yellowstone National  
1125 Park. (a) Mean hourly movement rates for 21 GPS-collared wolves and predicted population  
1126 mean from a general additive mixed model (left ordinate), and hourly number of directly-  
1127 observed daylight encounters between wolves and elk (right ordinate). (b) Predicted 5-hr  
1128 movement rates across 21 GPS-collared wolves (left ordinate) and 27 GPS-collared elk (right

1129 ordinate). Bars represent day (white), night (black), and variation in dawn/dusk periods (grey)  
1130 from 15 Oct. – 31 May.

1131

1132 **Figure 3** Effects of diel wolf activity (predicted 5-hr wolf movement rate) on elk habitat  
1133 selection in northern Yellowstone National Park, 2001-2004. (a-c) Elk were more likely to select  
1134 risky places (areas where kills occurred and open grasslands) when wolf activity was low (1.42  
1135 km/5-hrs) than when it was high (2.80 km/5-hrs); lines are population-averaged fitted values  
1136 with 95% confidence intervals (shaded areas) from the best-fit space × activity models  
1137 (Appendix S7). (d-f) Frequency of elk steps ending in risky places (locations > mean spatial risk:  
1138 predicted kill occurrence = 4.5; kill density = 0.22; openness = 194; left ordinate) was greatest at  
1139 night when wolf activity (mean 5-hr movement rate at 2-hr intervals; right ordinate) was low.

1140

1141 **Figure 4** Visualization of how diel wolf activity shaped the landscape of fear for adult female elk  
1142 in northern Yellowstone National Park, 2001-2004. We examined kill density in one part of our  
1143 study area, (a), and used the corresponding best-fit space × activity step-selection model, (b), to  
1144 calculate elk avoidance across this area when wolf activity was low (1.42 km/5-hrs) and high  
1145 (2.80 km/5-hrs). Risky places where kills were densely concentrated were valleys when wolf  
1146 activity was low, (c), and peaks when wolf activity was high, (d). Black lines in (a,c, and d)  
1147 denote roads.

1148 **Figure 1.**

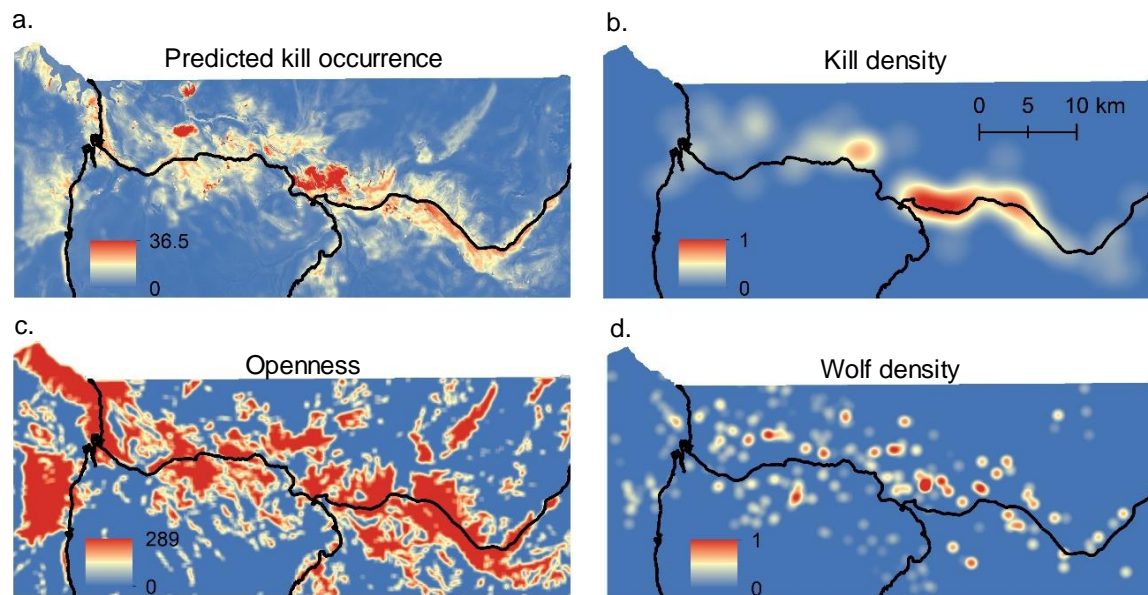

1149

1150

1151 **Figure 2.**

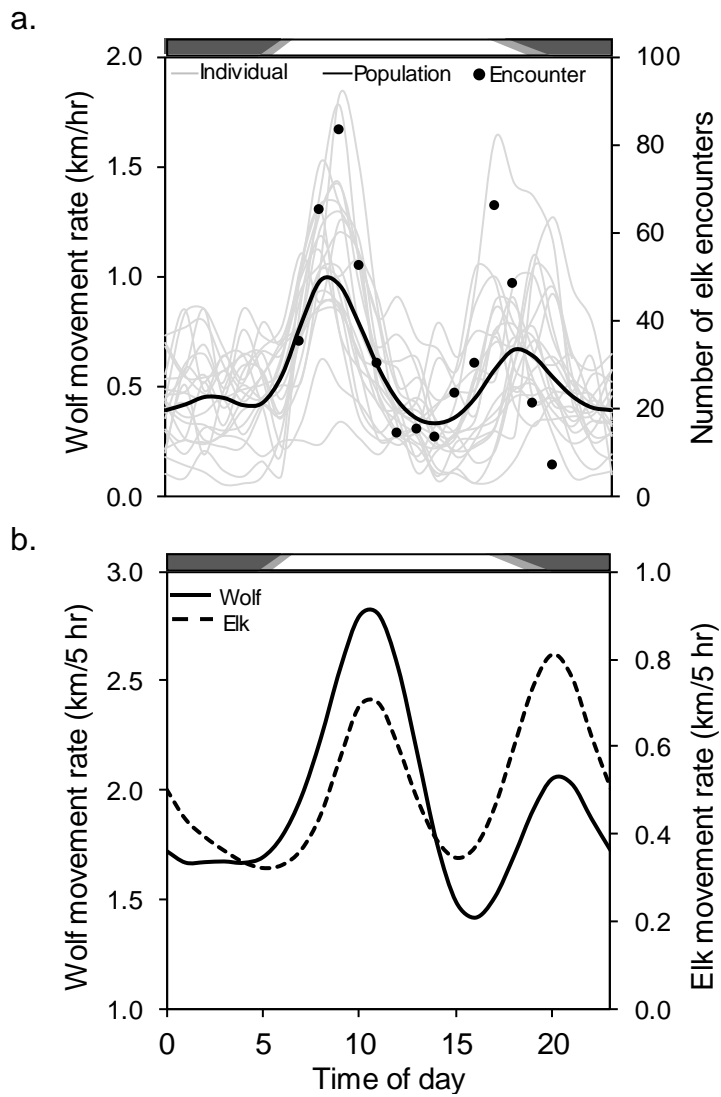

1152

1153 **Figure 3.**

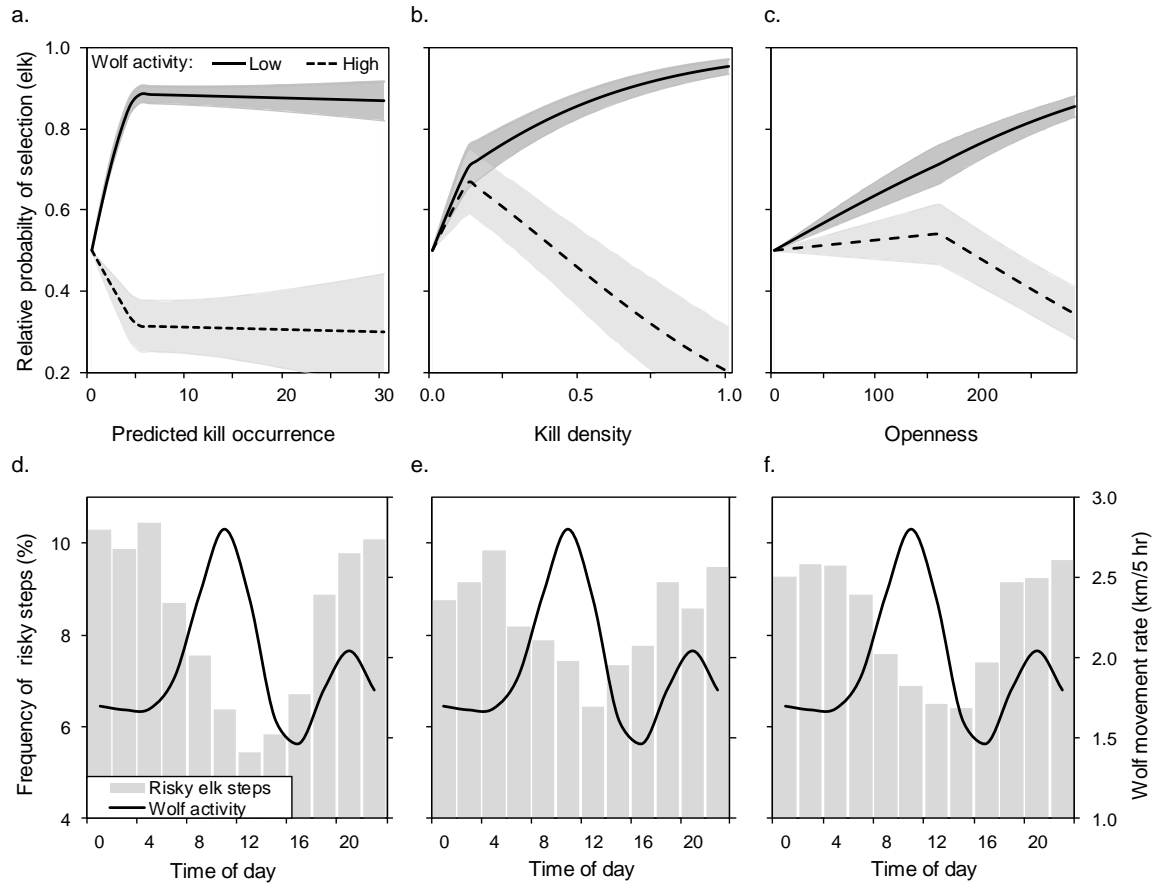

1154

1155 **Figure 4.**

1156

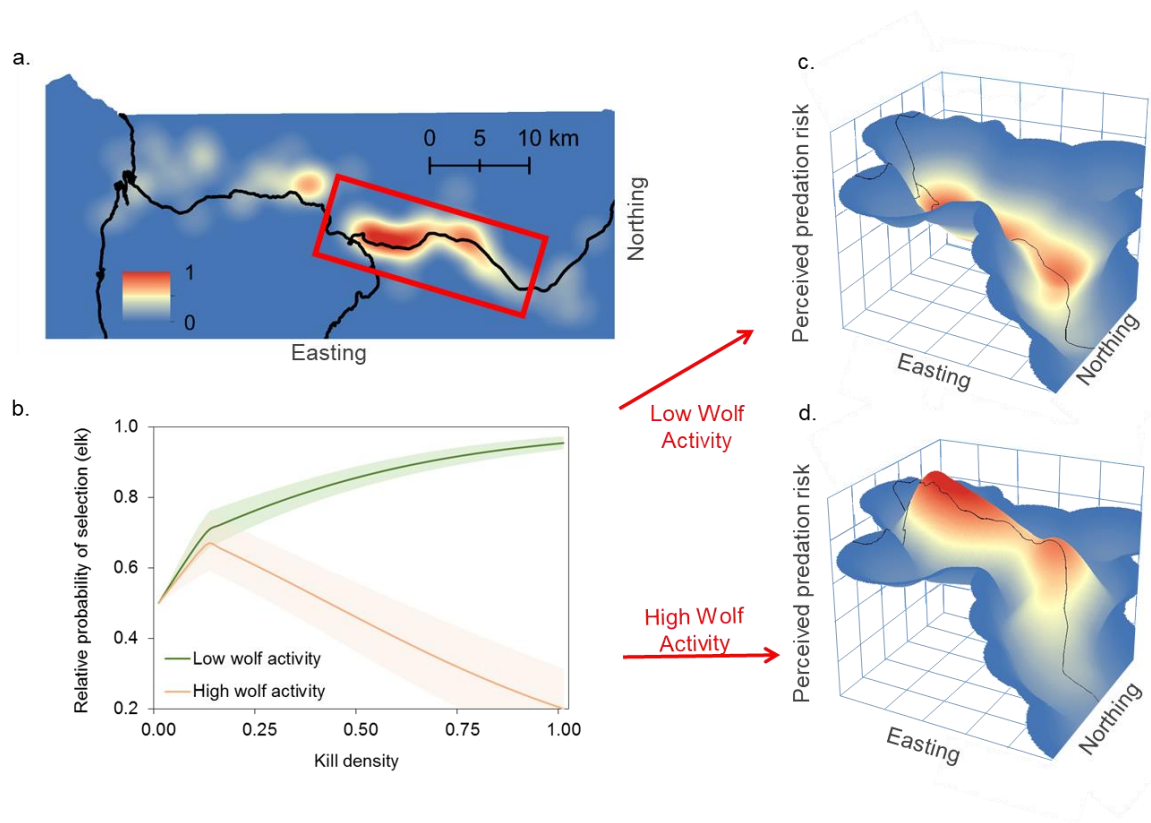

1157

1158

## SUPPORTING INFORMATION

1159 Appendix S1. Sample size of movement steps used to calculate diel activity pattern for 21 GPS-collared wolves in northern  
 1160 Yellowstone National Park, 2004-2013. Values represent the steps calculated from consecutive 1-hour (outside parentheses) and 5-  
 1161 hour (inside parentheses) locations.

1162

| Wolf ID          | Sex | Winter    |           |            |           |           |            |           |            |           |            |
|------------------|-----|-----------|-----------|------------|-----------|-----------|------------|-----------|------------|-----------|------------|
|                  |     | 2004-05   | 2005-06   | 2006-07    | 2007-08   | 2008-09   | 2009-10    | 2010-11   | 2011-12    | 2012-13   | 2013-14    |
| 227              | M   | 580 (120) |           |            |           |           |            |           |            |           |            |
| 470              | F   | 629 (120) |           |            |           |           |            |           |            |           |            |
| 525              | F   |           | 670 (135) | 1387 (272) |           |           |            |           |            |           |            |
| 527              | F   |           | 629 (127) |            |           |           |            |           |            |           |            |
| 593              | F   |           |           | 438 (81)   |           |           |            |           |            |           |            |
| 625              | F   |           |           |            | 718 (144) | 714 (140) |            |           |            |           |            |
| 627              | M   |           |           |            | 714 (144) |           |            |           |            |           |            |
| 642              | F   |           |           |            |           |           | 714 (142)  | 709 (144) |            |           |            |
| 685              | M   |           |           |            |           | 714 (144) | 1413 (282) |           |            |           |            |
| 692              | F   |           |           |            |           | 620 (120) |            |           |            |           |            |
| 693              | F   |           |           |            |           | 692 (140) | 708 (144)  |           |            |           |            |
| 752              | F   |           |           |            |           |           |            | 704 (142) |            |           |            |
| 775              | M   |           |           |            |           |           |            | 704 (140) | 700 (138)  |           |            |
| 777              | M   |           |           |            |           |           |            | 708 (139) | 1416 (282) |           |            |
| 829              | F   |           |           |            |           |           |            |           | 712 (144)  |           |            |
| 832              | F   |           |           |            |           |           |            |           | 715 (144)  | 506 (100) |            |
| 889              | F   |           |           |            |           |           |            |           |            | 533 (108) | 652 (128)  |
| 890              | M   |           |           |            |           |           |            |           |            |           | 714 (144)  |
| 907              | F   |           |           |            |           |           |            |           |            |           | 694 (138)  |
| 910              | M   |           |           |            |           |           |            |           |            |           | 694 (138)  |
| SW763            | M   |           |           |            |           |           |            |           |            | 698 (144) | 1417 (275) |
| Total 1-Hr Steps |     | 1209      | 1299      | 1825       | 1432      | 2740      | 2835       | 2825      | 3543       | 1737      | 4171       |
| Total 5-Hr Steps |     | 240       | 262       | 353        | 288       | 544       | 568        | 565       | 708        | 352       | 823        |

1163



1164 Appendix S2. Distribution of wolf-killed (a) adult male elk, and (b) adult female and calf elk  
1165 during winter in northern Yellowstone National Park, 2001-2004. Contours are 10% kernel  
1166 isopleths from a kernel density estimator applied to kill locations pooled across years. Red  
1167 represents the highest density of kills and black lines denote roads.  
1168

a.

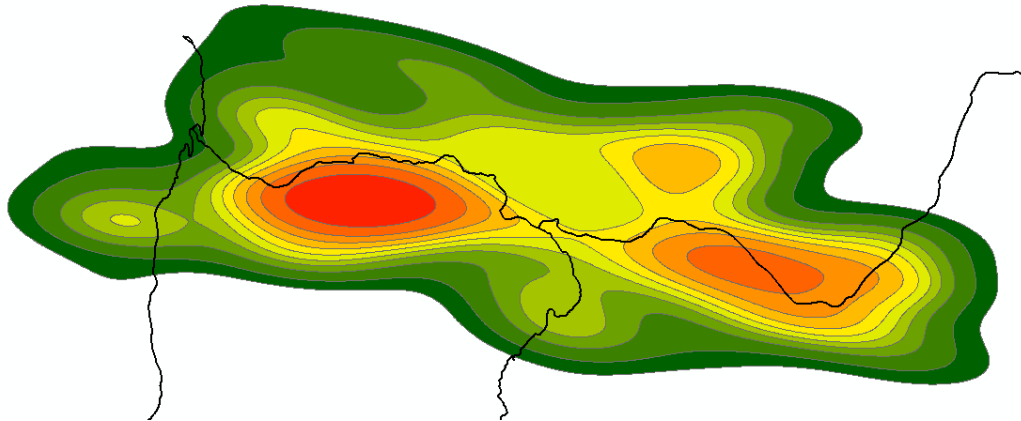

b.

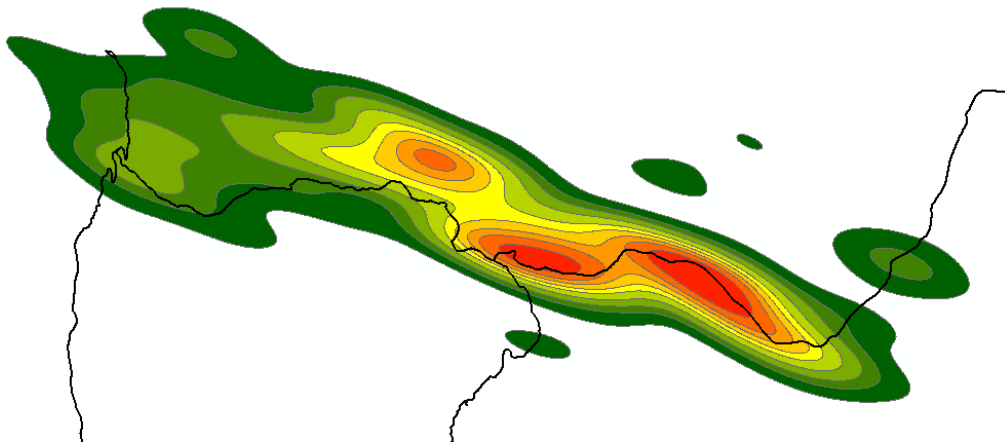

1169

1170

1171 Appendix S3. Annual diel activity patterns of wolves during winter in northern Yellowstone  
1172 National Park, 2004-2013. Mean hourly movement rate for each of 10 years (2-5 GPS-collared  
1173 wolves per year; Appendix S1) and predicted population mean from a general additive mixed  
1174 model (left ordinate), and hourly number of directly-observed daylight encounters between  
1175 wolves and elk (right ordinate). Bars represent day (white), night (black), and variation in  
1176 dawn/dusk periods (grey) from 15 Oct. – 31 May.  
1177

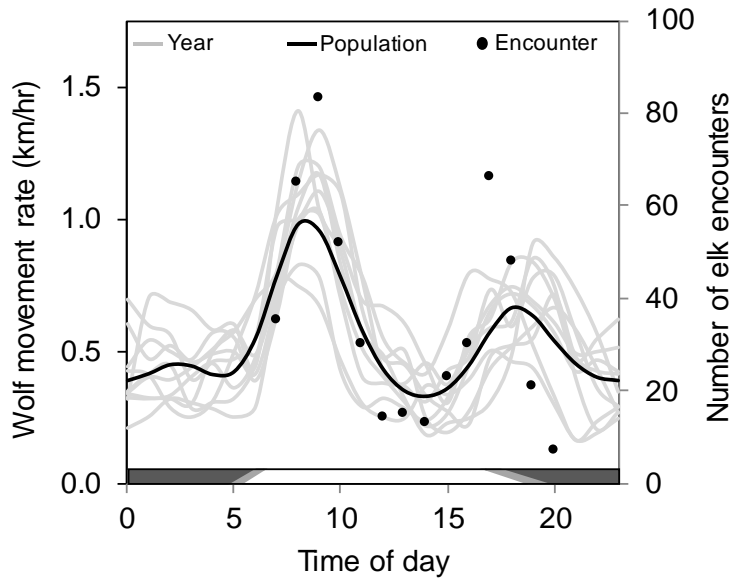

1179 Appendix S4. Model selection results for matched case-control logistic regression models  
 1180 describing the relationship between elk habitat selection and four indices of spatial risk  
 1181 (predicted kill occurrence [a], kill density [b], openness [c], and wolf density [d]) in northern  
 1182 Yellowstone National Park, 2001-2004. Variables risk1 and risk2 contain a linear spline for  
 1183 spatial risk at the indicated threshold. The simple linear model (risk) includes no threshold.  
 1184 Number of parameters (K), QIC, and differences in QIC compared to the best model ( $\Delta$ QIC) are  
 1185 given for each model. The best model for each spatial risk index is in bold face.  
 1186

| Model set                     | Threshold   | K        | QIC             | $\Delta$ QIC |
|-------------------------------|-------------|----------|-----------------|--------------|
| (a) Predicted kill occurrence |             |          |                 |              |
| risk                          | n/a         | 1        | 27560.52        | 347.13       |
| risk1 + risk2                 | 2.50        | 2        | 27214.47        | 0.83         |
| <b>risk1 + risk2</b>          | <b>2.60</b> | <b>2</b> | <b>27213.61</b> | <b>0.00</b>  |
| risk1 + risk2                 | 2.70        | 2        | 27214.12        | 0.48         |
| (b) Kill density              |             |          |                 |              |
| risk                          | n/a         | 1        | 28052.84        | 78.72        |
| risk1 + risk2                 | 0.11        | 2        | 27974.83        | 0.71         |
| <b>risk1 + risk2</b>          | <b>0.12</b> | <b>2</b> | <b>27974.12</b> | <b>0.00</b>  |
| risk1 + risk2                 | 0.13        | 2        | 27976.56        | 2.44         |
| (c) Openness                  |             |          |                 |              |
| risk                          | n/a         | 1        | 27392.60        | 16.35        |
| risk1 + risk2                 | 1.00        | 2        | 27376.26        | 0.01         |
| <b>risk1 + risk2</b>          | <b>2.00</b> | <b>2</b> | <b>27376.25</b> | <b>0.00</b>  |
| risk1 + risk2                 | 3.00        | 2        | 27377.97        | 1.72         |
| (d) Wolf density              |             |          |                 |              |
| risk                          | n/a         | 1        | 28109.00        | 9.98         |
| risk1 + risk2                 | 0.40        | 2        | 28099.19        | 0.17         |
| <b>risk1 + risk2</b>          | <b>0.41</b> | <b>2</b> | <b>28099.02</b> | <b>0.00</b>  |
| risk1 + risk2                 | 0.42        | 2        | 28099.13        | 0.11         |

1187

1188

1189 Appendix S5. Best-fit matched case-control logistic regression models for the effects of four  
 1190 indices of spatial risk (predicted kill occurrence [a], kill density [b], openness [c], and wolf  
 1191 density [d]) on elk habitat selection in northern Yellowstone National Park, 2001-2004.  
 1192 Variables risk1 and risk2 are the slopes before and after each index-specific threshold. Model  
 1193 selection results are presented in Appendix S4. Confidence intervals were computed using robust  
 1194 standard errors.

1195

| Parameter                     | Threshold | $\beta$ | SE     | <i>P</i> | [95% confidence interval] |        |
|-------------------------------|-----------|---------|--------|----------|---------------------------|--------|
| (a) Predicted kill occurrence |           |         |        |          |                           |        |
| risk1                         | 2.60      | 0.479   | 0.030  | <0.001   | 0.421                     | 0.536  |
| risk2                         |           | -0.001  | 0.003  | 0.755    | -0.006                    | 0.004  |
| (b) Kill density              |           |         |        |          |                           |        |
| risk1                         | 0.12      | 6.82    | 0.62   | <0.01    | -13.25                    | 13.49  |
| risk2                         |           | 0.67    | 0.13   | <0.01    | -1.321                    | 1.321  |
| (c) Openness                  |           |         |        |          |                           |        |
| risk1                         | 2.00      | 0.1630  | 0.0400 | <0.001   | 0.0760                    | 0.2500 |
| risk2                         |           | 0.0025  | 0.0002 | <0.001   | 0.0021                    | 0.0029 |
| (d) Wolf density              |           |         |        |          |                           |        |
| risk1                         | 0.41      | 0.84    | 0.18   | <0.01    | 0.49                      | 1.19   |
| risk2                         |           | -2.06   | 0.84   | 0.02     | -3.71                     | -0.40  |

1196

1197

1198 Appendix S6. Model selection results for matched case-control logistic regression models  
 1199 describing the interactive effect of spatial risk (predicted kill occurrence [a], kill density [b],  
 1200 openness [c], and wolf density [d]) and diel wolf activity (WA; km travelled/5-hr) on elk habitat  
 1201 selection in Yellowstone National Park, 2001–2004. Variables risk1 and risk2 contain a linear  
 1202 spline for spatial risk at the indicated threshold. Space-only models (risk1 + risk2) are the best-fit  
 1203 models from Appendix S5. Space x activity models are the top models from a grid search of  
 1204 thresholds for each hourly lag ( $\leq 5$ ) in diel wolf activity. Number of parameters (K), QIC, and  
 1205 differences in QIC compared to the best model ( $\Delta$ QIC) are given for each model. Average  
 1206 Spearman-rank correlation between observed and predicted values calculated from K-fold cross  
 1207 validation ( $r_s$ ) is given for the best-fit model (identified in bold).  
 1208

| Model set                                          | Threshold    | Lag      | K        | QIC             | $\Delta$ QIC | $r_s$       |
|----------------------------------------------------|--------------|----------|----------|-----------------|--------------|-------------|
| (a) Predicted kill occurrence                      |              |          |          |                 |              |             |
| risk1 + risk2                                      | 2.60         | NA       | 2        | 27213.61        | 126.73       |             |
| risk1 + risk2 + (risk1 x WA) + (risk2 x WA)        | 3.40         | 0        | 4        | 27167.92        | 81.04        |             |
| risk1 + risk2 + (risk1 x WA) + (risk2 x WA)        | 4.40         | 1        | 4        | 27126.15        | 39.27        |             |
| risk1 + risk2 + (risk1 x WA) + (risk2 x WA)        | 4.50         | 2        | 4        | 27092.01        | 5.13         |             |
| <b>risk1 + risk2 + (risk1 x WA) + (risk2 x WA)</b> | <b>4.50</b>  | <b>3</b> | <b>4</b> | <b>27086.88</b> | <b>0.00</b>  | <b>0.99</b> |
| risk1 + risk2 + (risk1 x WA) + (risk2 x WA)        | 4.20         | 4        | 4        | 27117.72        | 30.84        |             |
| risk1 + risk2 + (risk1 x WA) + (risk2 x WA)        | 3.40         | 5        | 4        | 27171.30        | 84.42        |             |
| (b) Kill density                                   |              |          |          |                 |              |             |
| risk1 + risk2                                      | 0.12         | NA       | 2        | 27974.12        | 95.28        |             |
| risk1 + risk2 + (risk1 x WA) + (risk2 x WA)        | 0.12         | 0        | 4        | 27906.66        | 27.82        |             |
| risk1 + risk2 + (risk1 x WA) + (risk2 x WA)        | 0.12         | 1        | 4        | 27885.45        | 6.61         |             |
| <b>risk1 + risk2 + (risk1 x WA) + (risk2 x WA)</b> | <b>0.12</b>  | <b>2</b> | <b>4</b> | <b>27878.84</b> | <b>0.00</b>  | <b>0.97</b> |
| risk1 + risk2 + (risk1 x WA) + (risk2 x WA)        | 0.12         | 3        | 4        | 27884.87        | 6.03         |             |
| risk1 + risk2 + (risk1 x WA) + (risk2 x WA)        | 0.12         | 4        | 4        | 27909.96        | 31.12        |             |
| risk1 + risk2 + (risk1 x WA) + (risk2 x WA)        | 0.12         | 5        | 4        | 27948.24        | 69.40        |             |
| (c) Openness                                       |              |          |          |                 |              |             |
| risk1 + risk2                                      | 2.0          | NA       | 2        | 27376.25        | 200.98       |             |
| risk1 + risk2 + (risk1 x WA) + (risk2 x WA)        | 145.0        | 0        | 4        | 27257.81        | 82.54        |             |
| risk1 + risk2 + (risk1 x WA) + (risk2 x WA)        | 147.0        | 1        | 4        | 27208.14        | 32.87        |             |
| <b>risk1 + risk2 + (risk1 x WA) + (risk2 x WA)</b> | <b>159.0</b> | <b>2</b> | <b>4</b> | <b>27175.27</b> | <b>0.00</b>  | <b>0.99</b> |
| risk1 + risk2 + (risk1 x WA) + (risk2 x WA)        | 165.0        | 3        | 4        | 27185.38        | 10.11        |             |
| risk1 + risk2 + (risk1 x WA) + (risk2 x WA)        | 2.0          | 4        | 4        | 27242.36        | 67.09        |             |
| risk1 + risk2 + (risk1 x WA) + (risk2 x WA)        | 2.0          | 5        | 4        | 27319.06        | 143.79       |             |
| (d) Wolf density                                   |              |          |          |                 |              |             |
| risk1 + risk2                                      | 0.41         | NA       | 2        | 28099.02        | 35.28        |             |
| risk1 + risk2 + (risk1 x WA) + (risk2 x WA)        | 0.01         | 0        | 4        | 28077.67        | 13.93        |             |
| risk1 + risk2 + (risk1 x WA) + (risk2 x WA)        | 0.02         | 1        | 4        | 28069.14        | 5.40         |             |
| <b>risk1 + risk2 + (risk1 x WA) + (risk2 x WA)</b> | <b>0.02</b>  | <b>2</b> | <b>4</b> | <b>28063.74</b> | <b>0.00</b>  | <b>0.67</b> |
| risk1 + risk2 + (risk1 x WA) + (risk2 x WA)        | 0.03         | 3        | 4        | 28064.41        | 0.67         |             |
| risk1 + risk2 + (risk1 x WA) + (risk2 x WA)        | 0.03         | 4        | 4        | 28071.01        | 7.27         |             |
| risk1 + risk2 + (risk1 x WA) + (risk2 x WA)        | 0.03         | 5        | 4        | 28086.39        | 22.65        |             |

1209

1210

1211 Appendix S7. Best-fit matched case-control logistic regression models for the interactive  
 1212 effects of spatial risk (predicted kill occurrence [a], kill density [b], and openness [c]) and diel  
 1213 wolf activity (WA; km travelled/5-hr) on elk habitat selection in northern Yellowstone National  
 1214 Park, 2001-2004. Variables risk1 and risk2 are the slopes before and after each index-specific  
 1215 threshold. Model selection results are presented in Appendix S6. Confidence intervals were  
 1216 computed using robust standard errors.  
 1217

| Parameter                     | Threshold | Lag | $\beta$ | SE    | <i>P</i> | [95% confidence interval] |        |
|-------------------------------|-----------|-----|---------|-------|----------|---------------------------|--------|
| (a) Predicted kill occurrence |           |     |         |       |          |                           |        |
| risk1                         |           |     | 1.103   | 0.072 | <0.001   | 0.96                      | 1.24   |
| risk2                         | 4.50      | 3   | -0.009  | 0.028 | 0.744    | -0.07                     | 0.05   |
| risk1 x WA                    |           |     | -0.456  | 0.036 | <0.001   | -0.53                     | -0.39  |
| risk2 x WA                    |           |     | 0.002   | 0.015 | 0.873    | -0.03                     | 0.03   |
| (b) Kill density              |           |     |         |       |          |                           |        |
| risk1                         |           |     | 8.65    | 3.28  | 0.008    | 2.22                      | 15.08  |
| risk2                         | 0.12      | 2   | 7.44    | 0.86  | <0.001   | 5.75                      | 9.13   |
| risk1 x WA                    |           |     | -0.95   | 1.65  | 0.564    | -4.18                     | 2.28   |
| risk2 x WA                    |           |     | -3.51   | 0.44  | <0.001   | -4.38                     | -2.64  |
| (c) Openness                  |           |     |         |       |          |                           |        |
| risk1                         |           |     | 0.011   | 0.002 | <0.001   | 0.006                     | 0.015  |
| risk2                         | 159.00    | 2   | 0.020   | 0.002 | <0.001   | 0.016                     | 0.024  |
| risk1 x WA                    |           |     | -0.003  | 0.001 | 0.001    | -0.005                    | -0.001 |
| risk2 x WA                    |           |     | -0.009  | 0.001 | <0.001   | -0.011                    | -0.007 |

1218

1219

1220 Appendix S8. Aspen and willow distribution in northern Yellowstone National Park in  
1221 relation to spatial variation in wolf predation risk (predicted kill occurrence [a], kill density [b],  
1222 and openness [c]). Predation risk values in [a] and [b] are the average predicted kill occurrence  
1223 and kill density at willow and aspen locations from 2000-2004. Aspen location data are from the  
1224 1999 Northern Range Vegetation Layer of Yellowstone National Park (Spatial Analysis Center  
1225 at Yellowstone National Park). Willow location data are from a comprehensive field mapping  
1226 and inventory that concluded in 2010 (M. Tercek; <http://www.yellowstoneecology.com/>).  
1227 Openness data are from a 1991 vegetation layer that accounted for vegetative changes follow the  
1228 1988 fires (Mattson et al. 1998).

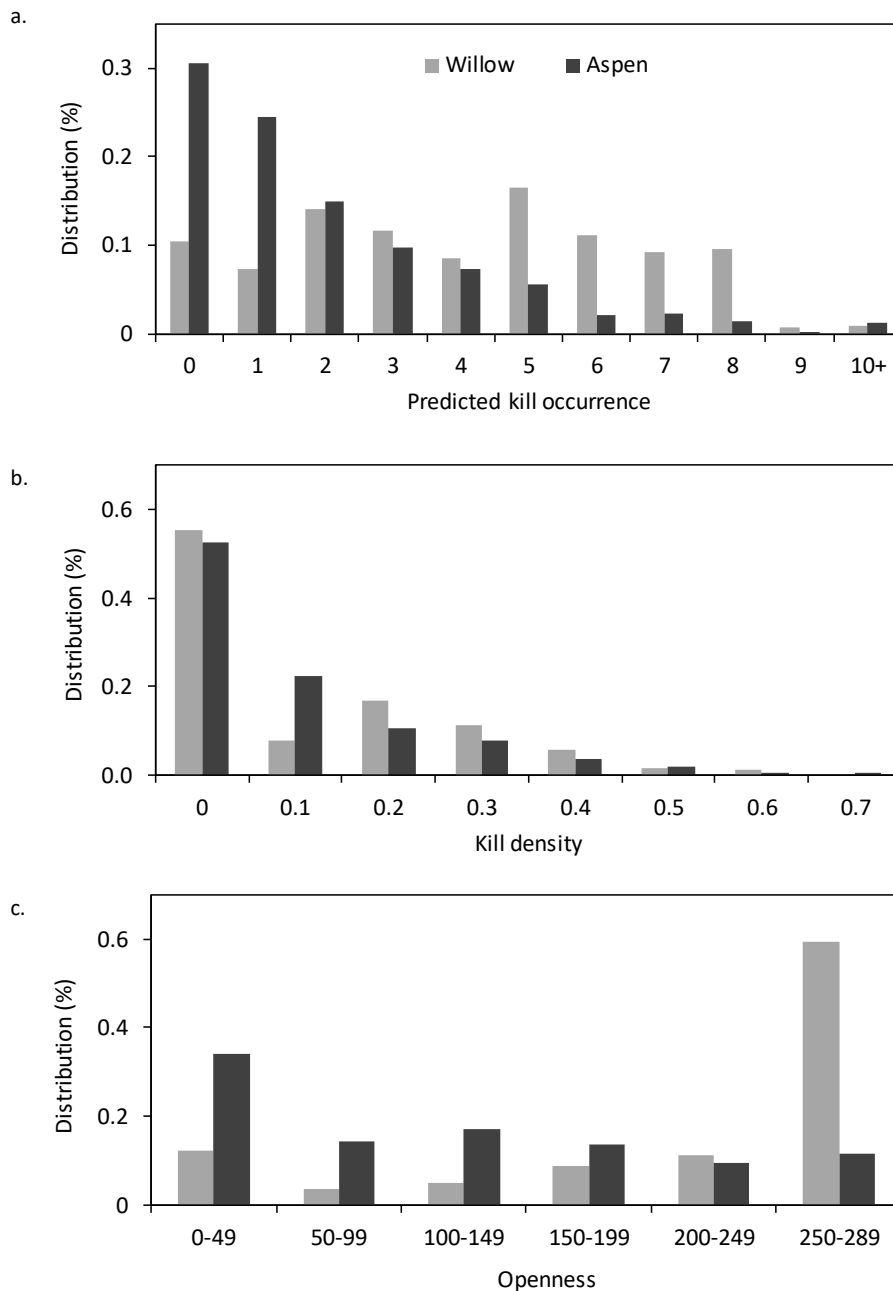

1229

1230 Video S1. Animated visualization of how diel wolf activity shaped the landscape of fear for  
1231 adult female elk in northern Yellowstone National Park, 2001-2004. We examined kill density in  
1232 one part of our study area, (a), and used the corresponding best-fit space  $\times$  activity habitat  
1233 selection model, (b), to calculate elk avoidance across this area throughout the diel cycle. Risky  
1234 places where kills were densely concentrated are represented in red. Peaks identify risky places  
1235 elk avoided; valleys represent safe places they utilized. Black lines denote roads.
